# Supplementary material
Source: PubMed Central journal article supplement (PMC4047464)
Supplement: supp_M113.033845_mcp.M113.033845-1.pdf [file supp_M113.033845_mcp.M113.033845-1.pdf]

## Supplementary Figure Legends

**Figure S1. Unsupervised hierarchical clustering of the 23 HCC cell lines (horizontal axis) and phosphorylation status of the mTOR and MAPK signaling nodes (vertical axis).** Red, white and blue colors indicate high, intermediate and low levels of signaling node phosphorylation. Light green and yellow represent signaling components of the MAPK pathway and mTOR pathway, respectively. Signaling components of the MAPK and mTOR pathways highly related to HCC cell line subtypes are labeled C1 and C2, respectively. Clustering revealed formation of 2 major groups, A and B, in the cell lines. The 10 cell lines that showed the highest IC50 for sorafenib are highlighted in orange.

**Figure S2. Unsupervised hierarchical clustering of the 95 HCC cell lines (horizontal axis) and phosphorylation status of the mTOR and MAPK signaling nodes (vertical axis).** Red, white and blue colors indicate high, intermediate and low levels of signaling node phosphorylation. Light green and yellow represent signaling components of the MAPK pathway and mTOR pathway, respectively. Signaling components related to HCC cell line subtypes are labeled C1 and C2, respectively. Clustering revealed formation of 2 major groups, A and B, in the cell lines. The 23 HCC cell lines are highlighted in purple.

## **LIST OF TABLES**

**Supplementary Table S1.** List of cell lines used for RPPA construction.

**Supplementary Table S2.** List of 180 phosphorylation site-specific antibodies.

**Supplementary Table S3.** Correlation between sensitivity to sorafenib and the phosphorylation of 180 signaling molecules.

**Supplementary Table S4.** Clinical characteristics of patients.

**Supplementary Table S5.** List of the 511 kinase genes sequenced.

**Supplementary Table S6.** Kinase gene alterations in HCC cells.

**Supplementary Table S7.** mTOR and MAPK pathway gene alterations in HCC cells.

**Supplementary Table S8.** Chou-Talalay median dose effect analysis.

**Supplementary Table S9.** List of the MAPK and mTOR signaling components used for unsupervised hierarchical clustering analyses.

**Supplementary Table S10.** Fisher's exact test: Association of cancer types with activation status of MAPK and mTOR signaling.

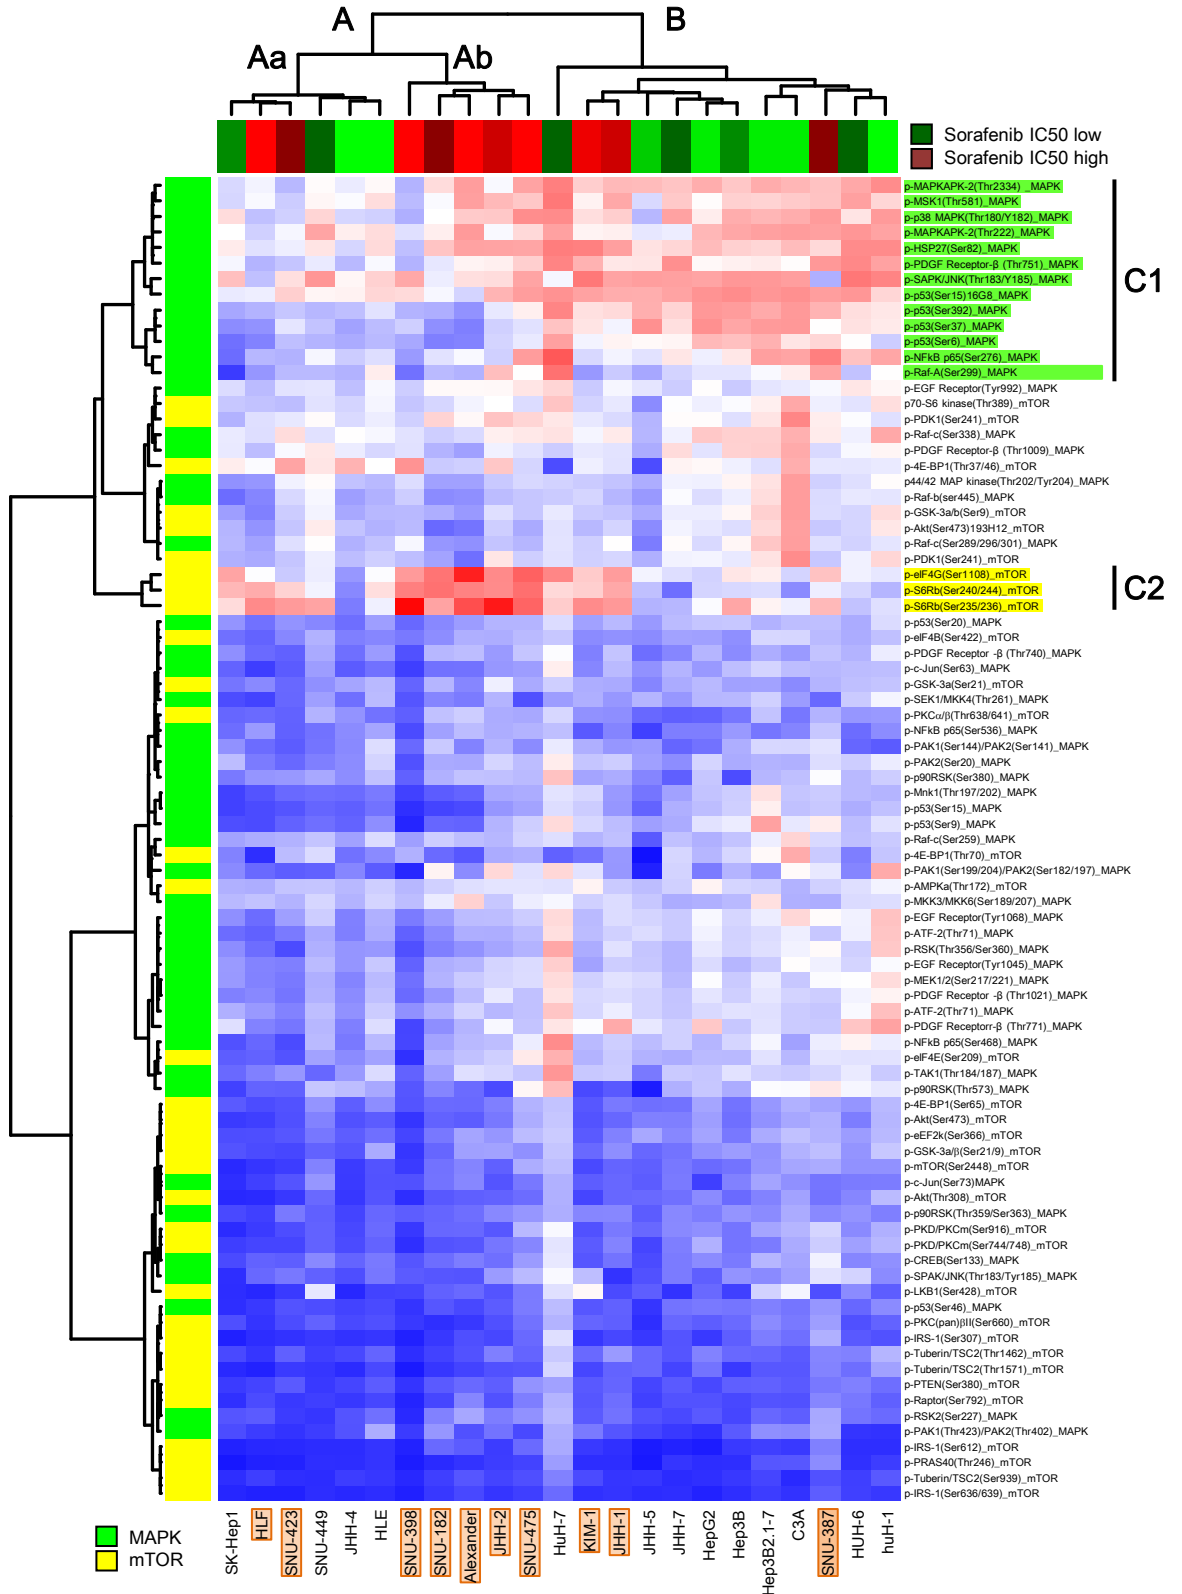

Supplementary Figure S1.

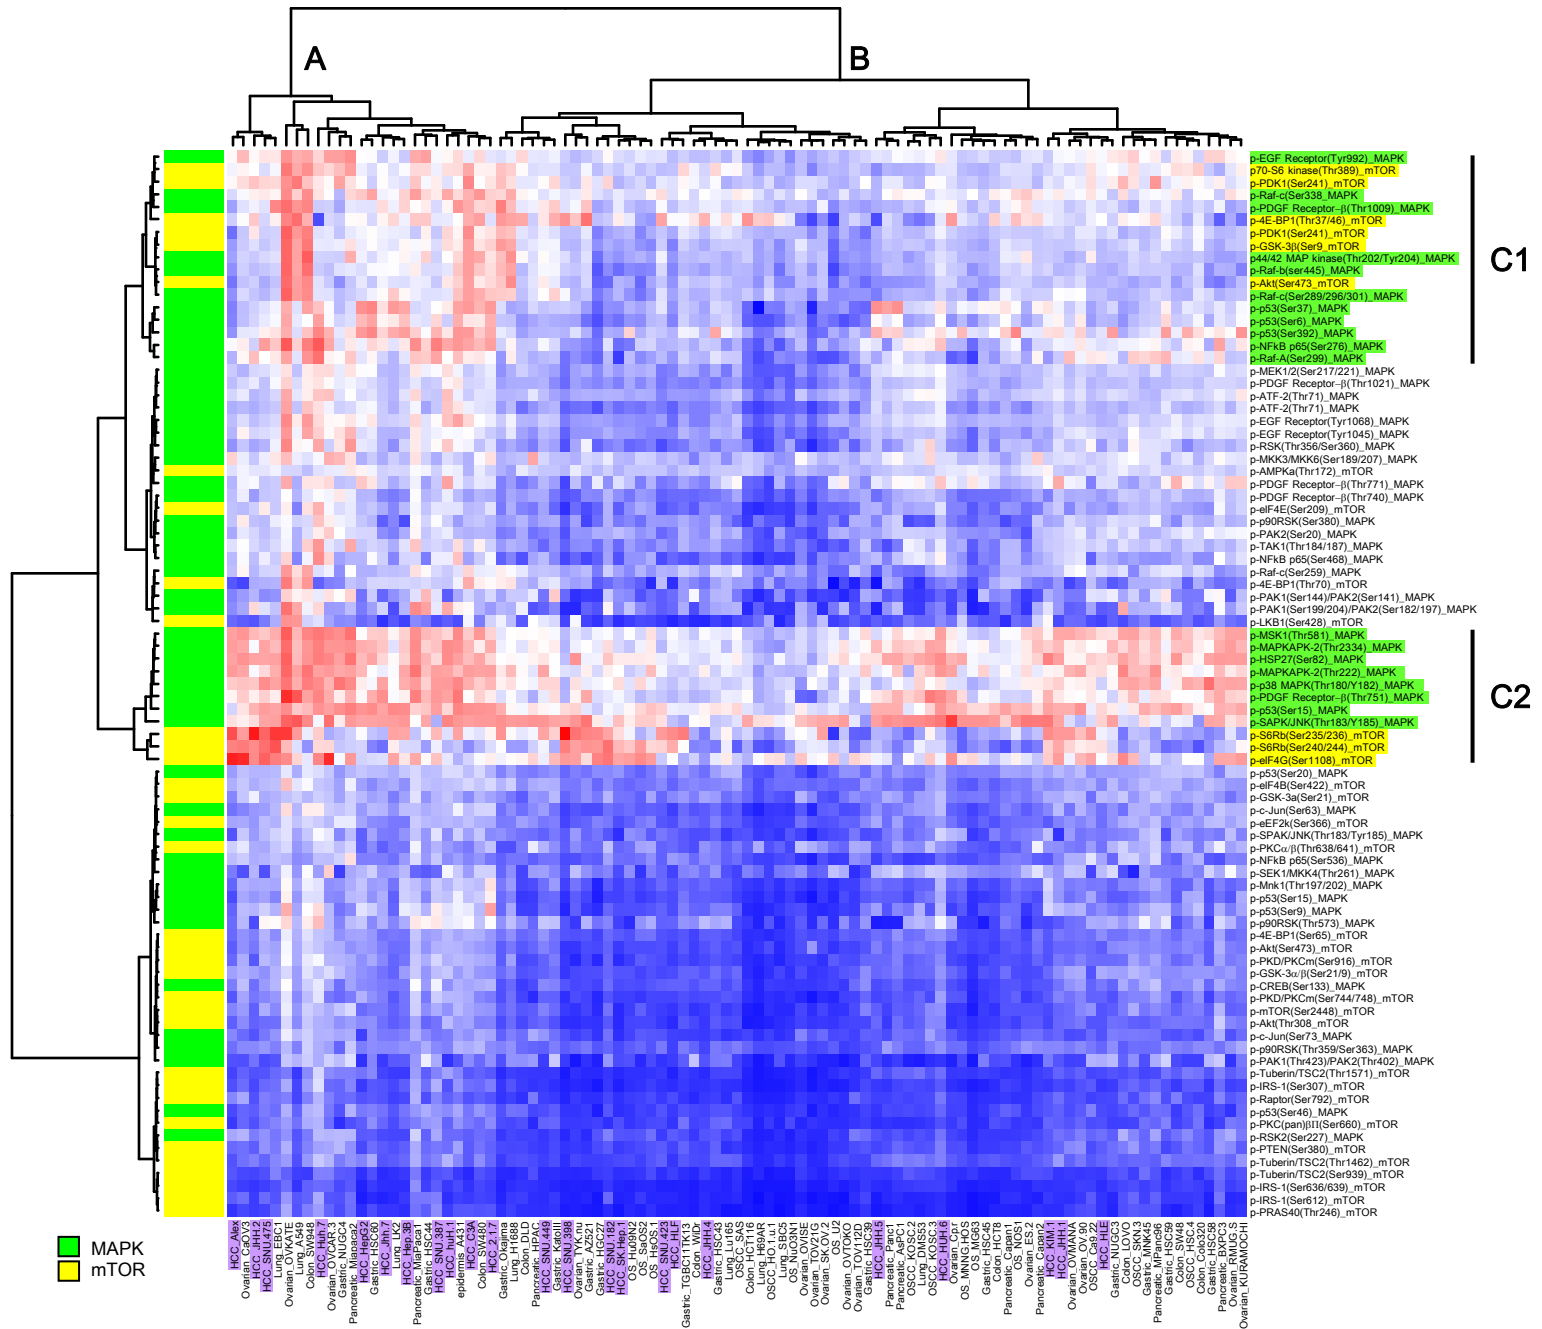

Supplementary Figure S2.

**Supplementary Table S1. List of cell lines used for RPPA construction**

| #                                                    | Cell line      | Source         | #                                                                 | Cell line | Source     |
|------------------------------------------------------|----------------|----------------|-------------------------------------------------------------------|-----------|------------|
| <b>Hepatocellular carcinoma (HCC): 23 cell lines</b> |                |                | <b>Colon cancer: 9 cell lines</b>                                 |           |            |
| 1                                                    | HepG2          | JCRB-HSRRB     | 1                                                                 | DLD1      | JCRB-HSRRB |
| 2                                                    | HLE            | JCRB-HSRRB     | 2                                                                 | HCT-116   | ATCC       |
| 3                                                    | huH-1          | JCRB-HSRRB     | 3                                                                 | WiDr      | JCRB-HSRRB |
| 4                                                    | HUH-6 clone 5  | JCRB-HSRRB     | 4                                                                 | SW1116    | ATCC       |
| 5                                                    | HuH-7          | JCRB-HSRRB     | 5                                                                 | SW48      | ATCC       |
| 6                                                    | JHH-7          | JCRB-HSRRB     | 6                                                                 | SW948     | ATCC       |
| 7                                                    | HLF            | JCRB-HSRRB     | 7                                                                 | SW480     | ATCC       |
| 8                                                    | C3A(HepG2/C3A) | ATCC           | 8                                                                 | COLO-320  | RBCCB      |
| 9                                                    | Hep 3B2.1-7    | ATCC           | 9                                                                 | Lovo      | JCRB-HSRRB |
| 10                                                   | JHH-1          | JCRB-HSRRB     | <b>Pancreatic cancer: 9 cell lines</b>                            |           |            |
| 11                                                   | JHH-2          | JCRB-HSRRB     | 1                                                                 | MIAPaCa-1 | ATCC       |
| 12                                                   | JHH-4          | JCRB-HSRRB     | 2                                                                 | MIAPaCa-2 | ATCC       |
| 13                                                   | JHH-5          | JCRB-HSRRB     | 3                                                                 | MPanc-96  | ATCC       |
| 14                                                   | Alexander      | ATCC           | 4                                                                 | PANC-1    | ATCC       |
| 15                                                   | Hep-3B         | JCRB-HSRRB     | 5                                                                 | AsPC-1    | ATCC       |
| 16                                                   | KIM-1          | JCRB-HSRRB     | 6                                                                 | BxPC-3    | ATCC       |
| 17                                                   | SK-Hep-1       | ATCC           | 7                                                                 | Capan-1   | ATCC       |
| 18                                                   | SNU-182        | ATCC           | 8                                                                 | Capan-2   | ATCC       |
| 19                                                   | SNU-387        | ATCC           | 9                                                                 | HPAC      | ATCC       |
| 20                                                   | SNU-398        | ATCC           | <b>Lung cancer: 8 cell lines</b>                                  |           |            |
| 21                                                   | SNU-423        | ATCC           | 1                                                                 | A549      | JCRB-HSRRB |
| 22                                                   | SNU-449        | ATCC           | 2                                                                 | EBC1      | JCRB-HSRRB |
| 23                                                   | SNU-475        | ATCC           | 3                                                                 | LK-2      | RBCCB      |
| <b>Ovarian cancer: 16 cell lines</b>                 |                |                | 4                                                                 | Lu-165    | RBCCB      |
| 1                                                    | CaOV-3         | ATCC           | 5                                                                 | NCI-H1688 | ATCC       |
| 2                                                    | TYK-nu         | JCRB-HSRRB     | 6                                                                 | H69AR     | ATCC       |
| 3                                                    | TYK-nu.CP-r    | JCRB-HSRRB     | 7                                                                 | SBC5      | JCRB-HSRRB |
| 4                                                    | RMUG-S         | JCRB-HSRRB     | 8                                                                 | DMS53     | ATCC       |
| 5                                                    | ES-2           | ATCC           | <b>Osteosarcoma: 8 cell lines</b>                                 |           |            |
| 6                                                    | SK-OV-3        | ATCC           | 1                                                                 | U-2       | ATCC       |
| 7                                                    | OV-90          | ATCC           | 2                                                                 | SaOS2     | ATCC       |
| 8                                                    | TOV-112D       | ATCC           | 3                                                                 | NOS1      | RBCCB      |
| 9                                                    | TOV-21G        | ATCC           | 4                                                                 | HuO 9N2   | RBCCB      |
| 10                                                   | KURAMOCHI      | JCRB-HSRRB     | 5                                                                 | HuO-3N1   | RBCCB      |
| 11                                                   | OVCAR-3        | ATCC           | 6                                                                 | MNNG/HOS  | ATCC       |
| 12                                                   | OVISE          | JCRB-HSRRB     | 7                                                                 | MG-63     | RBCCB      |
| 13                                                   | OVKATE         | JCRB-HSRRB     | 8                                                                 | Hs-OS-1   | RBCCB      |
| 14                                                   | OVMANA         | JCRB-HSRRB     | <b>Oral cancer: 7 cell lines</b>                                  |           |            |
| 15                                                   | OVSAGO         | JCRB-HSRRB     | 1                                                                 | SAS       | JCRB-HSRRB |
| 16                                                   | OVTOKO         | JCRB-HSRRB     | 2                                                                 | Ca9-22    | RBCCB      |
| <b>Gastric cancer: 15 cell lines</b>                 |                |                | 3                                                                 | Ho-1-u-1  | JCRB-HSRRB |
| 1                                                    | HSC-39         | Suppl. Ref [1] | 4                                                                 | HSC-4     | RBCCB      |
| 2                                                    | HSC-43         | Suppl. Ref [1] | 5                                                                 | KOSC-2    | JCRB-HSRRB |
| 3                                                    | HSC-44         | Suppl. Ref [1] | 6                                                                 | KOSC-3    | JCRB-HSRRB |
| 4                                                    | HSC-45         | Suppl. Ref [1] | 7                                                                 | SKN-3     | JCRB-HSRRB |
| 5                                                    | HSC-58         | Suppl. Ref [1] | <b>Epidermoid carcinoma: 1 cell line†</b>                         |           |            |
| 6                                                    | HSC-60         | Suppl. Ref [1] | 1                                                                 | A431      | RBCCB      |
| 7                                                    | HSC-59         | Suppl. Ref [1] |                                                                   |           |            |
| 8                                                    | MKN-45         | JCRB-HSRRB     | <b>Abbreviations:</b> JCRB-HSRPB, Japanese Collection of Research |           |            |
| 9                                                    | Okajima        | Suppl. Ref [2] | Bioresources-Human Science Research Resources Bank (Osaka,        |           |            |
| 10                                                   | AZ521          | RBCCB          | Japan); ATCC, American Type Culture Collection (Manassas,         |           |            |
| 11                                                   | Kato-III       | RBCCB          | VA); RBCCB, RIKEN BioResource Center Cell Bank (Tsukuba,          |           |            |
| 12                                                   | NUGC-3         | JCRB-HSRRB     | Japan).                                                           |           |            |
| 13                                                   | NUGC-4         | JCRB-HSRRB     | †EGF treated A431 cells were included as a control.               |           |            |
| 14                                                   | HGC27          | RBCCB          |                                                                   |           |            |
| 15                                                   | TGBC11TKB      | RBCCB          |                                                                   |           |            |

## **SUPPLEMENTARY REFERENCES**

1. Yanagihara K, Tanaka H, Takigahira M, Ino Y, Tamaguchi Y, Toge T, et al. Establishment of two cell lines from human gastric scirrhous carcinoma that possess the potential to metastasize spontaneously in nude mice. *Cancer Sci.* 2004;95:575-582.
2. Yamada Y, Yoshida T, Hayashi K, Sekiya T, Yokota J, Hirohashi S, et.al. p53 gene mutations in gastric cancer metastases and in gastric cancer cell lines derived from metastases. *Cancer Res.* 1991 Nov 1;51(21):5800-5.

**Supplementary Table S2. List of 180 phosphorylation site-specific antibodies**

| Supplier | Cat. # | Ab name                                                        | Pathway            | Dilution | Ab type |
|----------|--------|----------------------------------------------------------------|--------------------|----------|---------|
| CST      | 9570   | p-eNOS (Ser1177) C9C3                                          | Angiogenesis       | 1:1000   | Ra mAb  |
| CST      | 9296   | p-Bad(Ser112)                                                  | Apoptosis          | 1:2000   | Mo mAb  |
| CST      | 5286   | p-Bad(Ser136) 185D10                                           | Apoptosis          | 1:500    | Ra mAb  |
| CST      | 9297   | p-Bad(Ser155)                                                  | Apoptosis          | 1:1000   | Ra pAb  |
| CST      | 2827   | p-Bcl-2(Ser70) 5H2                                             | Apoptosis          | 1:1000   | Ra mAb  |
| CST      | 2875   | p-Bcl-2 (Thr56) Antibody (Human Specific)                      | Apoptosis          | 1:1000   | Ra pAb  |
| CST      | 4585   | p-Bim (Ser69) D7E11                                            | Apoptosis          | 1:1000   | Ra mAb  |
| CST      | 3079   | p-Aurora A (Thr288) C39D8                                      | Cell cycle         | 1:1000   | Ra mAb  |
| CST      | 2914   | p-Aurora A (Thr288)/Aurora B (Thr232)/Aurora C (Thr198) D13A11 | Cell cycle         | 1:2000   | Ra mAb  |
| CST      | 3300   | p-Cyclin D1 (Thr286) D29B3                                     | Cell cycle         | 1:1000   | Ra mAb  |
| CST      | 9307   | p-Rb (Ser780)                                                  | Cell cycle         | 1:1000   | Ra pAb  |
| CST      | 9301   | p-Rb (Ser795)                                                  | Cell cycle         | 1:1000   | Ra pAb  |
| CST      | 9308   | p-Rb (Ser807/811)                                              | Cell cycle         | 1:1000   | Ra pAb  |
| CST      | 4910   | p-Wee1 (Ser642) D47G5                                          | Cell Cycle         | 1:1000   | Ra mAb  |
| CST      | 3843   | p-AP2M1                                                        | Cytoskelton        | 1:1000   | Ra pAb  |
| CST      | 3313   | p-Cofilin(Ser3) 77G2                                           | Cytoskelton        | 1:1000   | Ra mAb  |
| CST      | 3149   | p-Ezrin(Thr567)/Radixin(Thr564)/Moesin(thr558) 41A3            | Cytoskelton        | 1:1000   | Ra mAb  |
| CST      | 3040   | p-MYPT(Ser507)                                                 | Cytoskelton        | 1:1000   | Ra pAb  |
| CST      | 3048   | p-MYPT(Ser668)                                                 | Cytoskelton        | 1:1000   | Ra pAb  |
| CST      | 4563   | p-MYPT(Thr853)                                                 | Cytoskelton        | 1:1000   | Ra pAb  |
| CST      | 3111   | p-VASP(Ser157)                                                 | Cytoskelton        | 1:1000   | Ra pAb  |
| CST      | 3114   | p-VASP(Ser239)                                                 | Cytoskelton        | 1:1000   | Ra pAb  |
| CST      | 4526   | p-ATM(Ser1981) 10H11.E12                                       | DNA damage         | 1:1000   | Mo mAb  |
| CST      | 2853   | p-ATR(Ser428)                                                  | DNA damage         | 1:1000   | Ra pAb  |
| CST      | 9373   | P-BAP1 (Ser592)                                                | DNA damage         | 1:1000   | Ra pAb  |
| CST      | 9009   | p-BRCA1(Ser1524)                                               | DNA damage         | 1:1000   | Ra pAb  |
| CST      | 2349   | p-Chk1 (Ser296)                                                | DNA damage         | 1:1000   | Ra pAb  |
| CST      | 2344   | p-Chk1 (Ser317)                                                | DNA damage         | 1:1000   | Ra pAb  |
| CST      | 2341   | p-Chk1 (Ser345)                                                | DNA damage         | 1:1000   | Ra pAb  |
| CST      | 2348   | p-Chk1 (Ser345) 133D3                                          | DNA damage         | 1:1000   | Ra mAb  |
| CST      | 2666   | p-Chk2 (Ser19)                                                 | DNA damage         | 1:1000   | Ra pAb  |
| CST      | 2665   | p-Chk2 (Ser33/35)                                              | DNA damage         | 1:1000   | Ra pAb  |
| CST      | 2668   | p-Chk2 (Thr387)                                                | DNA damage         | 1:1000   | Ra pAb  |
| CST      | 2661   | p-Chk2 (Thr68)                                                 | DNA damage         | 1:1000   | Ra pAb  |
| CST      | 9284   | p-p53(Ser15)                                                   | DNA damage         | 1:1000   | Ra pAb  |
| CST      | 9286   | p-p53(Ser15) 16G8                                              | DNA damage         | 1:1000   | Mo mAb  |
| CST      | 9287   | p-p53(Ser20)                                                   | DNA damage         | 1:2000   | Ra pAb  |
| CST      | 9289   | p-p53(Ser37)                                                   | DNA damage         | 1:1000   | Ra pAb  |
| CST      | 9281   | p-p53(Ser392)                                                  | DNA damage         | 1:1000   | Ra pAb  |
| CST      | 2521   | p-p53(Ser46)                                                   | DNA damage         | 1:750    | Ra pAb  |
| CST      | 9285   | p-p53(Ser6)                                                    | DNA damage         | 1:1000   | Ra pAb  |
| CST      | 9288   | p-p53(Ser9)                                                    | DNA damage         | 1:1000   | Ra pAb  |
| CST      | 9461   | p-FoxO1 (Ser256)                                               | Forkhead           | 1:750    | Ra pAb  |
| CST      | 2487   | p-FoxO1 (Ser319)/FoxO4(Ser262)                                 | Forkhead           | 1:1000   | Ra pAb  |
| CST      | 9464   | p-FoxO1 (Thr24)/FoxO3a (Thr32)                                 | Forkhead           | 1:750    | Ra pAb  |
| CST      | 2599   | p-FoxO1 (Thr24)/FoxO3a (Thr32)/FoxO4 (Thr28) 4G6               | Forkhead           | 1:1000   | Ra mAb  |
| CST      | 9466   | p-FoxO3a (Ser253)                                              | Forkhead           | 1:1000   | Ra pAb  |
| CST      | 9465   | p-FoxO3a (Ser318/321)                                          | Forkhead           | 1:750    | Ra pAb  |
| CST      | 3661   | p-Acetyl-CoA carboxylase(Ser79)                                | Glucose metabolism | 1:1000   | Ra pAb  |
| CST      | 2535   | p-AMPKa(Thr172)                                                | Glucose metabolism | 1:1000   | Ra pAb  |
| CST      | 4181   | p-AMPKb(Ser108)                                                | Glucose metabolism | 1:1000   | Ra pAb  |
| CST      | 3482   | p-LKB1 (Ser428) C67A3                                          | Glucose metabolism | 1:1000   | Ra mAb  |
| CST      | 2381   | p-IRS-1(Ser307)                                                | Glucose metabolism | 1:1000   | Ra pAb  |
| CST      | 3203   | p-IRS-1(Ser612) C15H5                                          | Glucose metabolism | 1:1000   | Ra mAb  |
| CST      | 2388   | p-IRS-1(Ser636/639)                                            | Glucose metabolism | 1:1000   | Ra pAb  |

|     |      |                                                                       |                    |        |        |
|-----|------|-----------------------------------------------------------------------|--------------------|--------|--------|
| CST | 3827 | p-PKM2 (Tyr105)                                                       | Glucose metabolism | 1:1000 | Ra pAb |
| CST | 3776 | p-Jak2 (Tyr1007/1008) C80C3                                           | JAK/STAT           | 1:1000 | Ra mAb |
| CST | 9171 | p-Stat 1(Y701)                                                        | JAK/STAT           | 1:1000 | Ra pAb |
| CST | 4441 | p-Stat 2(Y690)                                                        | JAK/STAT           | 1:1000 | Ra pAb |
| CST | 9134 | p-Stat 3(Ser727)                                                      | JAK/STAT           | 1:1000 | Ra pAb |
| CST | 9145 | p-Stat 3(Y705) D3A7                                                   | JAK/STAT           | 1:3000 | Ra mAb |
| CST | 9359 | p-Stat 5(Y694) C11C5                                                  | JAK/STAT           | 1:1000 | Ra mAb |
| CST | 9361 | p-Stat 6(Y641)                                                        | JAK/STAT           | 1:1000 | Ra pAb |
| CST | 9321 | p-Tyk2 (Tyr1054/1055)                                                 | JAK/STAT           | 1:1000 | Ra pAb |
| CST | 2577 | p-Histone H2A.X(Ser139)                                               | Mitosis marker     | 1:1000 | Ra pAb |
| CST | 9701 | p-Histone H3(Ser10)                                                   | Mitosis marker     | 1:1000 | Ra pAb |
| CST | 9713 | p-Histone H3(Ser28)                                                   | Mitosis marker     | 1:1000 | Ra pAb |
| CST | 9764 | p-Histone H3(Thr11)                                                   | Mitosis marker     | 1:1000 | Ra pAb |
| CST | 9714 | p-Histone H3(Thr3)                                                    | Mitosis marker     | 1:1000 | Ra pAb |
| CST | 2681 | p-IKK $\alpha$ (Ser180)/IKK $\beta$ (Ser181)                          | NFkB               | 1:1000 | Ra pAb |
| CST | 9246 | p-I $\kappa$ B- $\alpha$ (Ser32/36) 5A5                               | NFkB               | 1:1000 | Mo mAb |
| CST | 3037 | p-NFkB p65(Ser276)                                                    | NFkB               | 1:1000 | Ra pAb |
| CST | 3039 | p-NFkB p65(Ser468)                                                    | NFkB               | 1:1000 | Ra pAb |
| CST | 3033 | p-NFkB p65(Ser536)93H1                                                | NFkB               | 1:1000 | Ra mAb |
| CST | 5112 | p-ATF-2(Thr71)11G2                                                    | p38 MAPK           | 1:1000 | Ra mAb |
| CST | 2401 | p-HSP27(Ser82)                                                        | p38 MAPK           | 1:1000 | Ra pAb |
| CST | 3316 | p-MAPKAPK-2(Thr222) 9A7                                               | p38 MAPK           | 1:1000 | Ra mAb |
| CST | 3007 | p-MAPKAPK-2(Thr2334)27B7                                              | p38 MAPK           | 1:1000 | Ra mAb |
| CST | 9236 | p-MKK3/MKK6(Ser189/207) 22A8                                          | p38 MAPK           | 1:1000 | Ra mAb |
| CST | 9595 | p-MSK1(Thr581)                                                        | p38 MAPK           | 1:1000 | Ra pAb |
| CST | 4511 | p-p38 MAPK(Thr180/Y182 ) D3F9                                         | p38 MAPK           | 1:1000 | Ra mAb |
| CST | 9371 | p-PKC(pan) $\beta$ II (Ser660)                                        | Phospholipase      | 1:1000 | Ra pAb |
| CST | 9375 | p-PKC $\alpha$ / $\beta$ (Thr638/641)                                 | Phospholipase      | 1:1000 | Ra pAb |
| CST | 9374 | p-PKC $\Delta$ (Thr505)                                               | Phospholipase      | 1:1000 | Ra pAb |
| CST | 9376 | p-PKC $\Delta$ / $\theta$ (Ser643/676)                                | Phospholipase      | 1:750  | Ra pAb |
| CST | 9378 | p-PKCZ/ $\lambda$ (Thr410/403)                                        | Phospholipase      | 1:750  | Ra pAb |
| CST | 9377 | p-PKC $\theta$ (Thr538)                                               | Phospholipase      | 1:750  | Ra pAb |
| CST | 3871 | p-PLCg(Y1217)                                                         | Phospholipase      | 1:1000 | Ra pAb |
| CST | 3874 | p-PLCg(Y759)                                                          | Phospholipase      | 1:1000 | Ra pAb |
| CST | 2821 | p-PLCg(Y783)                                                          | Phospholipase      | 1:1000 | Ra pAb |
| CST | 4923 | Non-p-4E-BP1(Thr46) 87D12                                             | PI3K-AKT-mTOR      | 1:1000 | Ra mAb |
| CST | 9451 | p-4E-BP1 (Ser65)                                                      | PI3K-AKT-mTOR      | 1:1000 | Ra pAb |
| CST | 2855 | p-4E-BP1 (Thr37/46)                                                   | PI3K-AKT-mTOR      | 1:1000 | Ra pAb |
| CST | 9455 | p-4E-BP1 (Thr70)                                                      | PI3K-AKT-mTOR      | 1:1000 | Ra pAb |
| CST | 9234 | p70-S6 kinase(Thr389)                                                 | PI3K-AKT-mTOR      | 1:1000 | Ra pAb |
| CST | 4058 | Phospho-Akt (Ser473) 193H12                                           | PI3K-AKT-mTOR      | 1:2000 | Ra mAb |
| CST | 2965 | p-Akt(Thr308)C31E5                                                    | PI3K-AKT-mTOR      | 1:1000 | Ra mAb |
| CST | 3691 | p-eEF2k(Ser366)                                                       | PI3K-AKT-mTOR      | 1:1000 | Ra pAb |
| CST | 3591 | p-eIF4B(Ser422)                                                       | PI3K-AKT-mTOR      | 1:1000 | Ra pAb |
| CST | 9741 | p-eIF4E(Ser209)                                                       | PI3K-AKT-mTOR      | 1:1000 | Ra pAb |
| CST | 2441 | p-eIF4G(Ser1108)                                                      | PI3K-AKT-mTOR      | 1:1000 | Ra pAb |
| CST | 9316 | p-GSK-3 $\alpha$ (Ser21)36E9                                          | PI3K-AKT-mTOR      | 1:1000 | Ra mAb |
| CST | 9327 | p-GSK-3 $\alpha$ / $\beta$ (Ser21/9)37F11 ( GSK-3 $\alpha$ preferred) | PI3K-AKT-mTOR      | 1:1000 | Ra mAb |
| CST | 9323 | p-GSK-3 $\beta$ (Ser9)5B3                                             | PI3K-AKT-mTOR      | 1:1000 | Ra mAb |
| CST | 2971 | p-mTOR(Ser2448)                                                       | PI3K-AKT-mTOR      | 1:1000 | Ra pAb |
| CST | 3061 | p-PDK1(Ser241)                                                        | PI3K-AKT-mTOR      | 1:1000 | Ra pAb |
| CST | 2054 | p-PKD/PKCm(Ser744/748)                                                | PI3K-AKT-mTOR      | 1:1000 | Ra pAb |
| CST | 2051 | p-PKD/PKCm(Ser916)                                                    | PI3K-AKT-mTOR      | 1:1000 | Ra pAb |
| CST | 2997 | p-PRAS40(Thr246) C77D7                                                | PI3K-AKT-mTOR      | 1:1000 | Ra mAb |
| CST | 9551 | p-PTEN(Ser380)                                                        | PI3K-AKT-mTOR      | 1:1000 | Ra pAb |
| CST | 2083 | p-Raptor(Ser792)                                                      | PI3K-AKT-mTOR      | 1:1000 | Ra pAb |
| CST | 3556 | p-RSK2 (Ser227) D53A11                                                | PI3K-AKT-mTOR      | 1:1000 | Ra mAb |
| CST | 4858 | p-S6Rb( Ser235/236 ) D57.2.2e                                         | PI3K-AKT-mTOR      | 1:2000 | Ra mAb |
| CST | 4838 | p-S6Rb(Ser240/244)                                                    | PI3K-AKT-mTOR      | 1:1000 | Ra pAb |



|         |      |                                                       |               |        |        |
|---------|------|-------------------------------------------------------|---------------|--------|--------|
| CST     | 3615 | p-Tuberin/TSC2 (Ser939)                               | PI3K-AKT-mTOR | 1:1000 | Ra pAb |
| CST     | 3617 | p-Tuberin/TSC2 (Thr1462) 5B12                         | PI3K-AKT-mTOR | 1:1000 | Ra mAb |
| CST     | 3614 | p-Tuberin/TSC2 (Thr1571)                              | PI3K-AKT-mTOR | 1:1000 | Ra pAb |
| CST     | 9101 | p44/42 MAP kinase(Thr202/Tyr204)                      | Ras-Raf       | 1:1000 | Ra pAb |
| CST     | 9198 | p-CREB (Ser133) 87G3                                  | Ras-Raf       | 1:1000 | Ra mAb |
| CST     | 9154 | p-MEK1/2 (Ser217/221) 41G9                            | Ras-Raf       | 1:1000 | Ra mAb |
| CST     | 2111 | p-Mnk1 (Thr197/202)                                   | Ras-Raf       | 1:1000 | Ra pAb |
| CST     | 9335 | p-p90RSK(Ser380) 9D9                                  | Ras-Raf       | 1:1000 | Ra mAb |
| CST     | 9344 | p-p90RSK(Thr359/Ser363)                               | Ras-Raf       | 1:1000 | Ra pAb |
| CST     | 9346 | p-p90RSK(Thr573)                                      | Ras-Raf       | 1:1000 | Ra pAb |
| CST     | 2606 | p-PAK1(Ser144)/PAK2(Ser141)                           | Ras-Raf       | 1:1000 | Ra pAb |
| CST     | 2605 | p-PAK1(Ser199/204)/PAK2(Ser182/197)                   | Ras-Raf       | 1:1000 | Ra pAb |
| CST     | 2601 | p-PAK1(Thr423)/PAK2(Thr402)                           | Ras-Raf       | 1:1000 | Ra pAb |
| CST     | 2607 | p-PAK2(Ser20)                                         | Ras-Raf       | 1:1000 | Ra pAb |
| CST     | 4431 | p-Raf-A (Ser299)                                      | Ras-Raf       | 1:1000 | Ra pAb |
| CST     | 2696 | p-Raf-b(ser445)                                       | Ras-Raf       | 1:1000 | Ra pAb |
| CST     | 9421 | p-Raf-c (Ser259)                                      | Ras-Raf       | 1:1000 | Ra pAb |
| CST     | 9431 | p-Raf-c(Ser289/296/301)                               | Ras-Raf       | 1:1000 | Ra pAb |
| CST     | 9427 | p-Raf-c(Ser338)56A6                                   | Ras-Raf       | 1:1000 | Ra mAb |
| CST     | 9348 | p-RSK(Thr356/Ser360)                                  | Ras-Raf       | 1:1001 | Ra pAb |
| CST     | 2102 | Non-p-Src(Y416)7G9                                    | RTK/TK        | 1:1000 | Mo mAb |
| CST     | 2107 | Non-p-Src(Y527)                                       | RTK/TK        | 1:1000 | Ra pAb |
| CST     | 3714 | pALK (Tyr1282/1283)                                   | RTK/TK        | 1:1000 | Ra pAb |
| CST     | 3073 | p-c-Kit(Y703)D12E12                                   | RTK/TK        | 1:1000 | Ra mAb |
| CST     | 2237 | p-EGF Receptor (Tyr1045)                              | RTK/TK        | 1:1000 | Ra pAb |
| CST     | 3777 | p-EGF Receptor (Tyr1068) D7A5                         | RTK/TK        | 1:1000 | Ra mAb |
| CST     | 2235 | p-EGF Receptor (Tyr992)                               | RTK/TK        | 1:1000 | Ra pAb |
| CST     | 3474 | p-FLT3(Y591) 33G6                                     | RTK/TK        | 1:1000 | Ra mAb |
| CST     | 3233 | p-Gab1 (Tyr627) C32H2                                 | RTK/TK        | 1:1000 | Ra mAb |
| CST     | 3882 | p-Gab2 (Tyr452) C33G1                                 | RTK/TK        | 1:1000 | Ra mAb |
| CST     | 2243 | p-HER2/ErbB2 (Tyr1221/1222) 6B12                      | RTK/TK        | 1:1000 | Ra mAb |
| CST     | 2247 | p-HER2/ErbB2 (Tyr1248)                                | RTK/TK        | 1:1000 | Ra pAb |
| CST     | 3790 | p-HER4/ErbB4 (Tyr984)                                 | RTK/TK        | 1:1000 | Ra pAb |
| CST     | 3021 | p-IGF-I Receptor (Tyr1131)/Insulin Receptor (Tyr1146) | RTK/TK        | 1:1000 | Ra pAb |
| CST     | 3024 | p-IGF-I Receptor (Tyr1135/1136)                       | RTK/TK        | 1:1000 | Ra pAb |
| CST     | 4568 | p-IGF-I Receptor (Tyr980)                             | RTK/TK        | 1:1000 | Ra pAb |
| CST     | 3077 | p-Met(Thr1234/1235) D26                               | RTK/TK        | 1:1000 | Ra mAb |
| CST     | 3124 | p-PDGF Receptor-β(Thr1009) 42F9                       | RTK/TK        | 1:1000 | Ra mAb |
| CST     | 2227 | p-PDGF Receptor-β(Thr1021) 6F10                       | RTK/TK        | 1:1000 | Ra mAb |
| CST     | 3168 | p-PDGF Receptor-β(Thr740) 32A9                        | RTK/TK        | 1:1000 | Ra mAb |
| CST     | 4549 | p-PDGF Receptor-β(Thr751) C63G6                       | RTK/TK        | 1:1000 | Ra mAb |
| CST     | 3173 | p-PDGF Receptor-β(Thr771)                             | RTK/TK        | 1:1000 | Ra mAb |
| CST     | 3221 | p-Ret (Tyr905)                                        | RTK/TK        | 1:1000 | Ra pAb |
| Upstate | 209  | p-SHC(Y239)                                           | RTK/TK        | 1:1000 | Ra pAb |
| Upstate | 206  | p-SHC(Y317)                                           | RTK/TK        | 1:1000 | Ra pAb |
| CST     | 2007 | p-SHIP2(Tyr1135)                                      | RTK/TK        | 1:1000 | Ra pAb |
| CST     | 2101 | p-Src Family (Y416)                                   | RTK/TK        | 1:1000 | Ra pAb |
| CST     | 2105 | p-Src(Y527)                                           | RTK/TK        | 1:1000 | Ra pAb |
| CST     | 2715 | p-Syk (Tyr323)                                        | RTK/TK        | 1:1000 | Ra pAb |
| CST     | 2711 | p-Syk (Tyr525/526)                                    | RTK/TK        | 1:1000 | Ra pAb |
| CST     | 3817 | p-VEGF Receptor 2 (Tyr1059) D5A6                      | RTK/TK        | 1:1000 | Ra mAb |
| CST     | 3770 | p-VEGF Receptor 2 (Tyr1175) D5B11                     | RTK/TK        | 1:1000 | Ra mAb |
| CST     | 4991 | p-VEGF Receptor 2 (Tyr951) 15D2                       | RTK/TK        | 1:1000 | Ra mAb |
| CST     | 2701 | p-Zap-70 (Tyr319)/Syk (Tyr352)                        | RTK/TK        | 1:1000 | Ra pAb |
| CST     | 9221 | p-ATF-2(Thr71)                                        | SAPK/JNK      | 1:1000 | Ra pAb |
| CST     | 9261 | p-c-Jun (Ser63) II                                    | SAPK/JNK      | 1:1000 | Ra pAb |
| CST     | 3270 | p-c-Jun (Ser73) D47G9                                 | SAPK/JNK      | 1:1000 | Ra mAb |
| CST     | 4671 | p-SAPK/JNK(Thr183/Y185) 98F2                          | SAPK/JNK      | 1:1000 | Ra mAb |
| CST     | 9151 | p-SEK1/MKK4(Thr261)                                   | SAPK/JNK      | 1:1000 | Ra pAb |

|       |       |                                     |                   |        |        |
|-------|-------|-------------------------------------|-------------------|--------|--------|
| CST   | 4668  | p-SPAK/JNK(Thr183/Tyr185) 81E11     | SAPK/JNK          | 1:1000 | Ra mAb |
| CST   | 9516  | p-Smad1/5(Ser463/465) 41D10         | TGF- $\beta$      | 1:1000 | Ra mAb |
| CST   | 3108  | p-Smad2(Ser465/467) 138D4           | TGF- $\beta$      | 1:1000 | Ra mAb |
| CST   | 4508  | p-TAK1 (Thr184/187) 90C7            | TGF- $\beta$      | 1:1000 | Ra mAb |
| CST   | 2568  | p-LRP6 (Ser1490)                    | Wnt               | 1:1000 | Ra pAb |
| CST   | 9561  | p- $\beta$ -catenin(Ser33/37/Thr41) | Wnt               | 1:750  | Ra pAb |
| CST   | 9564  | p- $\beta$ -catenin(Ser45)          | Wnt               | 1:1000 | Ra pAb |
| Sigma | T6557 | $\gamma$ -Tublin                    | For normalization | 1:2000 | Mo mAb |

**Abbreviations:** CST, Cell Signaling Technology, Inc. (Danvers, MA); Upstate, Upstate Biotechnology, Inc. (Lake Placid, NY); Sigma, Sigma-Aldrich, Co. (St. Louis, MO); RTK/TK, Rreceptor tyrosine kinase/tyrosine kinase; Mo, mouse; Ra, rabbit; mAb, monoclonal antibody; pAb, polyconal antibody.

## Supplementary Table S3.

### Correlation between sensitivity to sorafenib and the phosphorylation of 180 signaling nodes

| Rank | Antibody                                          | Spearman CC | <i>P</i> value | Rank | Antibody                        | Spearman CC | <i>P</i> value |
|------|---------------------------------------------------|-------------|----------------|------|---------------------------------|-------------|----------------|
| 1    | p-S6Rb( Ser235/236 ) D57.2.2e                     | 0.5791      | 0.0044         | 60   | p-p53(Ser46)                    | -0.0504     | 0.8196         |
| 2    | p-S6Rb(Ser240/244)                                | 0.5524      | 0.0070         | 61   | p-Ret (Tyr905)                  | -0.0534     | 0.8091         |
| 3    | p-RSK2 (Ser227) D53A11                            | 0.3370      | 0.1156         | 62   | p-Stat 1(Y701)                  | -0.0613     | 0.7812         |
| 4    | p-eIF4G(Ser1108)                                  | 0.3320      | 0.1213         | 63   | p-MSK1(Thr581)                  | -0.0632     | 0.7742         |
| 5    | p-NFkB p65(Ser536) 93H1                           | 0.3281      | 0.1260         | 64   | p-Raf-c (Ser259)                | -0.0642     | 0.7708         |
| 6    | p-IRS-1(Ser612) C15H5                             | 0.3093      | 0.1502         | 65   | p-β-catenin(Ser33/37/Thr41)     | -0.0692     | 0.7535         |
| 7    | p-c-Kit(Y703) D12E12                              | 0.2688      | 0.2133         | 66   | p-ATR(Ser428)                   | -0.0702     | 0.7501         |
| 8    | p-Chk1 (Ser317)                                   | 0.2609      | 0.2274         | 67   | p-Smad2(Ser465/467) 138D4       | -0.0731     | 0.7398         |
| 9    | p-Tuberin/TSC2 (Ser939)                           | 0.2470      | 0.2537         | 68   | p-Tuberin/TSC2 (Thr1571)        | -0.0800     | 0.7160         |
| 10   | p-Bad(Ser136)185D10                               | 0.2322      | 0.2839         | 69   | p-Rb (Ser807/811)               | -0.0860     | 0.6958         |
| 11   | p-90RSK(Ser380) 9D9                               | 0.2292      | 0.2902         | 70   | p-PRAS40(Thr246) C77D7          | -0.0870     | 0.6925         |
| 12   | p-Bim (Ser69) D7E11                               | 0.2233      | 0.3031         | 71   | P-BAP1 (Ser592)                 | -0.0968     | 0.6593         |
| 13   | p-PAK1(Thr423)/PAK2(Thr402)                       | 0.2134      | 0.3254         | 72   | p-Met(Thr1234/1235) D26         | -0.1077     | 0.6236         |
| 14   | Non-p-Src(Y527)                                   | 0.1937      | 0.3730         | 73   | p-Stat 5(Y694) C11C5            | -0.1087     | 0.6203         |
| 15   | p-Cyclin D1 (Thr286) D29B3                        | 0.1897      | 0.3829         | 74   | p-Stat 3(Ser727)                | -0.1097     | 0.6171         |
| 16   | p-Chk1 (Ser345)                                   | 0.1729      | 0.4270         | 75   | p-p90RSK(Thr359/Ser363)         | -0.1126     | 0.6076         |
| 17   | p-PAK1(Ser199/204)/PAK2(Ser182/197)               | 0.1670      | 0.4432         | 76   | p-Rb (Ser795)                   | -0.1166     | 0.5949         |
| 18   | p-PKCZ/λ(Thr410/403)                              | 0.1611      | 0.4597         | 77   | p-Acetyl-CoA carboxylase(Ser79) | -0.1206     | 0.5824         |
| 19   | p-PTEN(Ser380)                                    | 0.1512      | 0.4879         | 78   | p-Bcl-2(Thr56)                  | -0.1245     | 0.5699         |
| 20   | p-PAK1(Ser144)/PAK2(Ser141)                       | 0.1344      | 0.5379         | 79   | p-LRP6 (Ser1490)                | -0.1255     | 0.5669         |
| 21   | p-ATM(Ser1981) 10H11.E12                          | 0.1324      | 0.5440         | 80   | p-Bad(Ser155)                   | -0.1275     | 0.5607         |
| 22   | p-PKCa/β(Thr638/641)                              | 0.1166      | 0.5933         | 81   | p-MEK1/2 (Ser217/221) 41G9      | -0.1314     | 0.5485         |
| 23   | p-HER2/ErbB2 (Tyr1221/1222) 6B12                  | 0.1136      | 0.6028         | 82   | p-MYPT(Ser668)                  | -0.1364     | 0.5334         |
| 24   | p-PKCθ(Thr538)                                    | 0.1136      | 0.6028         | 83   | p-Histone H3(Ser28)             | -0.1374     | 0.5304         |
| 25   | p-AMPKα(Thr172)                                   | 0.1117      | 0.6119         | 84   | p-p53(Ser20)                    | -0.1443     | 0.5097         |
| 26   | p-Raptor(Ser792)                                  | 0.1107      | 0.6123         | 85   | p-Src(Y527)                     | -0.1443     | 0.5097         |
| 27   | p-HER2/ErbB2 (Tyr1248)                            | 0.0988      | 0.6511         | 86   | p-Src Family (Y416)             | -0.1443     | 0.5097         |
| 28   | p-Chk2 (Ser19)                                    | 0.0879      | 0.6874         | 87   | p-eEF2k(Ser366)                 | -0.1462     | 0.5039         |
| 29   | p-eNOS (Ser1177) C9C3                             | 0.0800      | 0.7143         | 88   | p-PKD/PKCm(Ser744/748)          | -0.1462     | 0.5039         |
| 30   | p-Ezrin(Thr567)/Radixin(Thr564)/Moesin(thr558)    | 0.0771      | 0.7245         | 89   | p-EGF Receptor (Tyr1045)        | -0.1482     | 0.4980         |
| 31   | p-FLT3(Y591) 33G6                                 | 0.0731      | 0.7381         | 90   | p-Gab2 (Tyr452) C33G1           | -0.1571     | 0.4723         |
| 32   | p-Wee1 (Ser642) D47G5                             | 0.0573      | 0.7933         | 91   | p-p38 MAPK(Thr180/Y182 ) D3F9   | -0.1581     | 0.4695         |
| 33   | p-EGF Receptor (Tyr992)                           | 0.0553      | 0.8003         | 92   | p-eIF4B(Ser422)                 | -0.1611     | 0.4611         |
| 34   | p-IRS-1(Ser636/639)                               | 0.0455      | 0.8354         | 93   | p-PKD/PKCm(Ser916)              | -0.1611     | 0.4611         |
| 35   | p-Tuberin/TSC2 (Thr1462) 5B12                     | 0.0336      | 0.8780         | 94   | p-PKCA(Thr505)                  | -0.1640     | 0.4528         |
| 36   | p-eIF4E(Ser209)                                   | 0.0296      | 0.8923         | 95   | p-BRCA1(Ser1524)                | -0.1650     | 0.4500         |
| 37   | p-GSK-3α(Ser21) 36E9                              | 0.0267      | 0.9030         | 96   | p-Chk2 (Thr68)                  | -0.1680     | 0.4418         |
| 38   | p-PAK2(Ser20)                                     | 0.0257      | 0.9066         | 97   | p-LKB1 (Ser428) (C67A3)         | -0.1680     | 0.4418         |
| 39   | p-Smad1/5(Ser463/465) 41D10                       | 0.0227      | 0.9173         | 98   | p-FoxO3a (Ser318/321)           | -0.1700     | 0.4364         |
| 40   | p-PDGF Receptor-β(Thr740)                         | 0.0198      | 0.9281         | 99   | p-p53(Ser9)                     | -0.1709     | 0.4337         |
| 41   | p-MKK3/MKK6(Ser189/207) 22A8                      | 0.0168      | 0.9388         | 100  | p-4E-BP1 (Thr70)                | -0.1779     | 0.4151         |
| 42   | p-PKCAΔ/θ(Ser643/676)                             | 0.0148      | 0.9460         | 101  | p-IGF-I Receptor (Tyr1135/1136) | -0.1789     | 0.4124         |
| 43   | p-Raf-A (Ser299)                                  | 0.0030      | 0.9892         | 102  | p-CREB (Ser133) 87G3            | -0.1818     | 0.4046         |
| 44   | p-HSP27(Ser82)                                    | 0.0020      | 0.9928         | 103  | p-PLCg(Y759)                    | -0.1828     | 0.4020         |
| 45   | p-Raf-c(Ser338) 56A6                              | 0.0010      | 0.9964         | 104  | p-IRS-1(Ser307)                 | -0.1877     | 0.3892         |
| 46   | p-Chk1 (Ser296)                                   | -0.0079     | 0.9730         | 105  | p-mTOR(Ser2448)                 | -0.1927     | 0.3767         |
| 47   | p-AP2M1                                           | -0.0089     | 0.9694         | 106  | p-Mnk1 (Thr197/202)             | -0.1927     | 0.3767         |
| 48   | p-4E-BP1 (Thr37/46)                               | -0.0109     | 0.9622         | 107  | p-VASP(Ser157)                  | -0.1996     | 0.3595         |
| 49   | p-Aurora A (T288)/Aurora B (T232)/Aurora C (T198) | -0.0119     | 0.9586         | 108  | p-Chk2 (Ser33/35)               | -0.2016     | 0.3547         |
| 50   | p-PLCg(Y783)                                      | -0.0178     | 0.9370         | 109  | p-IkB-α (Ser32/36) 5A5          | -0.2036     | 0.3499         |
| 51   | p-SPAK/JNK(Thr183/Tyr185) 81E11                   | -0.0287     | 0.8976         | 110  | p-Zap-70 (Tyr319)/Syk (Tyr352)  | -0.2036     | 0.3499         |
| 52   | p-TAK1 (Thr184/187) 90C7                          | -0.0356     | 0.8727         | 111  | p-Chk2 (Thr387)                 | -0.2065     | 0.3428         |
| 53   | p-IGF-I R(Tyr1131)/Insulin R (Tyr1146)            | -0.0366     | 0.8691         | 112  | Non-p-Src(Y416) 7G9             | -0.2085     | 0.3381         |
| 54   | p-Cofilin(Ser3) 77G2                              | -0.0425     | 0.8478         | 113  | p-Tyk2 (Tyr1054/1055)           | -0.2125     | 0.3289         |
| 55   | p-Rb (Ser780)                                     | -0.0435     | 0.8443         | 114  | p-PKC(pan)βII (Ser660)          | -0.2144     | 0.3243         |
| 56   | p-FoxO1 (Ser319)/FoxO4(Ser262)                    | -0.0445     | 0.8407         | 115  | p-VEGF Receptor 2 (Tyr1175)     | -0.2164     | 0.3198         |
| 57   | p-VASP(Ser239)                                    | -0.0494     | 0.8231         | 116  | p-PDGF Receptor-β(Thr751)       | -0.2174     | 0.3175         |
| 58   | p-GSK-3α/β(Ser21/9) 37F11                         | -0.0494     | 0.8231         | 117  | p-PKM2 (Tyr105)                 | -0.2174     | 0.3175         |
| 59   | p-VEGF Receptor 2 (Tyr1059 )D5A6                  | -0.0494     | 0.8231         | 118  | p-MAPKAPK-2(Thr2334)27B7        | -0.2194     | 0.3131         |

| Rank | Antibody                                        | Spearman CC | <i>P</i> value |
|------|-------------------------------------------------|-------------|----------------|
| 119  | p-PDGF Receptor-β(Thr1021)                      | -0.2204     | 0.3108         |
| 120  | p-PLCg(Y1217)                                   | -0.2223     | 0.3064         |
| 121  | p70-S6 kinase(Thr389)                           | -0.2233     | 0.3042         |
| 122  | p-IGF-I Receptor (Tyr980)                       | -0.2253     | 0.2999         |
| 123  | p-Bad(Ser112)                                   | -0.2253     | 0.2999         |
| 124  | p-MAPKAPK-2(Thr222) 9A7                         | -0.2273     | 0.2956         |
| 125  | p-SHIP2(Tyr1135)                                | -0.2312     | 0.2871         |
| 126  | p-p53(Ser15)                                    | -0.2332     | 0.2829         |
| 127  | p-Syk (Tyr323)                                  | -0.2372     | 0.2746         |
| 128  | p-VEGF Receptor 2 (Tyr951) 15D2                 | -0.2372     | 0.2746         |
| 129  | p-p53(Ser6)                                     | -0.2460     | 0.2566         |
| 130  | p-NFκB p65(Ser276)                              | -0.2470     | 0.2546         |
| 131  | p-IKKα (Ser180)/IKKβ (Ser181)                   | -0.2500     | 0.2488         |
| 132  | p-Histone H3(Ser10)                             | -0.2500     | 0.2488         |
| 133  | p-PDGF Receptor-β(Thr771)                       | -0.2540     | 0.2412         |
| 134  | p-FoxO1 (Thr24)/FoxO3a (Thr32)                  | -0.2579     | 0.2338         |
| 135  | p-p53(Ser15) 16G8                               | -0.2609     | 0.2283         |
| 136  | p-p90RSK(Thr573)                                | -0.2619     | 0.2265         |
| 137  | p-Histone H3(Thr11)                             | -0.2638     | 0.2229         |
| 138  | p-FoxO1 (Thr24)/FoxO3a (Thr32)/FoxO4 (Thr28) 4C | -0.2717     | 0.2090         |
| 139  | p-Histone H2A.X(Ser139)                         | -0.2737     | 0.2056         |
| 140  | p-NFκB p65(Ser468)                              | -0.2757     | 0.2022         |
| 141  | p-Syk (Tyr525/526)                              | -0.2866     | 0.1844         |
| 142  | p-EGF Receptor (Tyr1068) D7A5                   | -0.2885     | 0.1813         |
| 143  | p-4E-BP1 (Ser65)                                | -0.2895     | 0.1798         |
| 144  | p-Chk1 (Ser345) 133D3                           | -0.2945     | 0.1722         |
| 145  | p-FoxO3a (Ser253)                               | -0.2994     | 0.1649         |
| 146  | p-MYPT(Thr853)                                  | -0.3024     | 0.1606         |
| 147  | p-Jak2 (Tyr1007/1008) C80C3                     | -0.3103     | 0.1495         |
| 148  | p-ATF-2(Thr71)11G2                              | -0.3123     | 0.1468         |
| 149  | p-p53(Ser392)                                   | -0.3142     | 0.1442         |
| 150  | p-RSK(Thr356/Ser360)                            | -0.3172     | 0.1403         |
| 151  | p-Gab1 (Tyr627) C32H2                           | -0.3221     | 0.1339         |
| 152  | p-Raf-c(Ser289/296/301)                         | -0.3271     | 0.1278         |
| 153  | p-MYPT(Ser507)                                  | -0.3271     | 0.1278         |
| 154  | p-c-Jun (Ser73) D47G9                           | -0.3291     | 0.1254         |
| 155  | p-GSK-3β(Ser9) 5B3                              | -0.3419     | 0.1107         |
| 156  | p-FoxO1 (Ser256)                                | -0.3458     | 0.1064         |
| 157  | p-AMPKb(Ser108)                                 | -0.3518     | 0.1003         |
| 158  | p-SHC(Y239)                                     | -0.3557     | 0.0963         |
| 159  | p-Histone H3(Thr3)                              | -0.3577     | 0.0944         |
| 160  | p-Akt(Thr308) C31E5                             | -0.3597     | 0.0925         |
| 161  | p-PDK1(Ser241)                                  | -0.3656     | 0.0869         |
| 162  | p-p53(Ser37)                                    | -0.3656     | 0.0869         |
| 163  | p44/42 MAP kinase(Thr202/Tyr204)                | -0.3666     | 0.0860         |
| 164  | p-ATF-2(Thr71)                                  | -0.3686     | 0.0843         |
| 165  | Non-p-4E-BP1(Thr46) 87D12                       | -0.3745     | 0.0791         |
| 166  | p-Stat 2(Y690)                                  | -0.3745     | 0.0791         |
| 167  | p-SEK1/MKK4(Thr261)                             | -0.3765     | 0.0774         |
| 168  | p-ALK (Tyr1282/1283)                            | -0.3844     | 0.0711         |
| 169  | p-Raf-b(ser445)                                 | -0.3864     | 0.0695         |
| 170  | p-Stat 6(Y641)                                  | -0.3962     | 0.0622         |
| 171  | p-PDGF Receptor-β(Thr1009)                      | -0.3982     | 0.0609         |
| 172  | p-Aurora A (Thr288) C39D8                       | -0.4051     | 0.0562         |
| 173  | p-Bcl-2(Ser70) 5H2                              | -0.4101     | 0.0531         |
| 174  | p-c-Jun (Ser63) II                              | -0.4111     | 0.0525         |
| 175  | p-HER4/ErbB4 (Tyr984)                           | -0.4160     | 0.0495         |
| 176  | p-β-catenin(Ser45)                              | -0.4298     | 0.0418         |
| 177  | p-Akt(Ser473) 193H12                            | -0.4684     | 0.0254         |
| 178  | p-Stat 3(Y705) D3A7                             | -0.4713     | 0.0244         |
| 179  | p-SAPK/JNK(Thr183/Y185) 98F2                    | -0.5188     | 0.0122         |
| 180  | p-SHC(Y317)                                     | -0.5623     | 0.0060         |

**Abbreviation:** Spearman CC, Spearman correlation coefficient.

**Supplementary Table S4. Clinical characteristics of patients**

| Patient | Age | Gender | Viral infection | Stage <sup>a</sup> | TNM <sup>a</sup> | Duration of Nexavar treatment (mo) | OS (mo) | AFP (ng/ml) before treatment <sup>b</sup> | AFP (ng/ml) after treatment <sup>b</sup> | Response <sup>c</sup> | Positivity <sup>d</sup> | Intensity <sup>e</sup> |
|---------|-----|--------|-----------------|--------------------|------------------|------------------------------------|---------|-------------------------------------------|------------------------------------------|-----------------------|-------------------------|------------------------|
| 1       | 62  | Male   | (-)             | IV                 | cT4N0M1          | 24.0                               | 27.0    | 1,621                                     | 816                                      | PR                    | 1                       | 1                      |
| 2       | 67  | Male   | HBV             | IV                 | cT3NxM1          | 2.4                                | 2.4     | 1,786                                     | –                                        | PD                    | 4                       | 3                      |
| 3       | 59  | Male   | HBV             | IV                 | cT3NxM1          | 2.4                                | 2.4     | 154,470                                   | 182780                                   | PD                    | 3                       | 3                      |
| 4       | 69  | Female | HCV             | IV                 | cT3NxM1          | 1.2                                | 4.0     | 29                                        | 412                                      | PD                    | 3                       | 3                      |
| 5       | 75  | Female | (-)             | IIIC               | cT3NxM0          | 1.0                                | 1.0     | 3                                         | –                                        | PD                    | 4                       | 3                      |
| 6       | 78  | Male   | (-)             | IIIB               | cT3bN0M0         | 1.7                                | –       | –                                         | –                                        | PD                    | 2                       | 3                      |
| 7       | 60  | Male   | HBV             | IIIA               | cT3aN0M0         | 2.3                                | 14.4    | –                                         | –                                        | PD                    | 4                       | 3                      |
| 8       | 51  | Female | HCV             | IV                 | cT3bN1M0         | 0.5                                | 2.0     | 4,359                                     | –                                        | PD                    | 2                       | 3                      |
| 9       | 90  | Male   | (-)             | II                 | cT2N0M0          | 1.8                                | 3.0     | 166                                       | –                                        | PD                    | 2                       | 3                      |

<sup>a</sup>According to the International Union Against Cancer (UICC) TNM Classification of Malignant Tumours, 7th edition (2009).

<sup>b</sup>Measured before and a month after sorafenib treatments.

<sup>c</sup>According to the Response Evaluation Criteria for Solid Tumors (RECIST) guidelines.

<sup>d</sup>Percentage of p-RPS6 Ser235/236-positive cells (0 = 0%, 1 = 1-25%, 2 = 26-50%, 3 = 51-75% and 4 = 76-100%).

<sup>e</sup>Intensity of p-RPS6 Ser235/236 staining (0, absent; 1, weak; 2, moderate; and 3, strong).

**Abbreviations:** mo, month; OS, overall survival; AFP,  $\alpha$ -fetoprotein; PR, partial response; PD, progressive disease

**Supplementary Table S5.****List of the 511 Kinase Genes Sequenced**

| #  | Name     | Entrez_Symbol | #   | Name    | Entrez_Symbol | #   | Name   | Entrez_Symbol |
|----|----------|---------------|-----|---------|---------------|-----|--------|---------------|
| 1  | AAK1     | AAK1          | 57  | CaMK1g  | CAMK1G        | 113 | DCLK2  | DCAMKL2       |
| 2  | LMR1     | AATK          | 58  | CaMK2a  | CAMK2A        | 114 | DCLK3  | DCAMKL3       |
| 3  | ABL1     | ABL1          | 59  | CaMK2b  | CAMK2B        | 115 | DDR1   | DDR1          |
| 4  | ABL2     | ABL2          | 60  | CaMK2d  | CAMK2D        | 116 | DDR2   | DDR2          |
| 5  | ALK2     | ACVR1         | 61  | CaMK2g  | CAMK2G        | 117 | SgK223 | DKFZp761P0423 |
| 6  | ALK4     | ACVR1B        | 62  | CaMK4   | CAMK4         | 118 | DMPK1  | DMPK          |
| 7  | ALK7     | ACVR1C        | 63  | CaMKK1  | CAMKK1        | 119 | DYRK1A | DYRK1A        |
| 8  | ACTR2    | ACVR2A        | 64  | CaMKK2  | CAMKK2        | 120 | DYRK1B | DYRK1B        |
| 9  | ACTR2B   | ACVR2B        | 65  | VACAMKL | CAMKV         | 121 | DYRK2  | DYRK2         |
| 10 | ALK1     | ACVRL1        | 66  | CASK    | CASK          | 122 | DYRK3  | DYRK3         |
| 11 | ADCK1    | ADCK1         | 67  | CCRK    | CCRK          | 123 | DYRK4  | DYRK4         |
| 12 | ADCK2    | ADCK2         | 68  | CDC2    | CDC2          | 124 | eEF2K  | EEF2K         |
| 13 | ADCK4    | ADCK4         | 69  | CHED    | CDC2L5        | 125 | EGFR   | EGFR          |
| 14 | ADCK5    | ADCK5         | 70  | CDK11   | CDC2L6        | 126 | HRI    | EIF2AK1       |
| 15 | BARK1    | ADRBK1        | 71  | MRCKa   | CDC42BPA      | 127 | PKR    | EIF2AK2       |
| 16 | BARK2    | ADRBK2        | 72  | MRCKb   | CDC42BPB      | 128 | PEK    | EIF2AK3       |
| 17 | AKT1     | AKT1          | 73  | DMPK2   | CDC42BPG      | 129 | GCN2   | EIF2AK4       |
| 18 | AKT2     | AKT2          | 74  | CDC7    | CDC7          | 130 | EphA1  | EPHA1         |
| 19 | AKT3     | AKT3          | 75  | CDK10   | CDK10         | 131 | EphA10 | EPHA10        |
| 20 | ALK      | ALK           | 76  | CDK2    | CDK2          | 132 | EphA2  | EPHA2         |
| 21 | AlphaK3  | ALPK1         | 77  | CDK3    | CDK3          | 133 | EphA3  | EPHA3         |
| 22 | AlphaK2  | ALPK2         | 78  | CDK4    | CDK4          | 134 | EphA4  | EPHA4         |
| 23 | AlphaK1  | ALPK3         | 79  | CDK5    | CDK5          | 135 | EphA5  | EPHA5         |
| 24 | STLK6    | ALS2CR2       | 80  | CDK6    | CDK6          | 136 | EphA6  | EPHA6         |
| 25 | PFTAIRE2 | ALS2CR7       | 81  | CDK7    | CDK7          | 137 | EphA7  | EPHA7         |
| 26 | MISR2    | AMHR2         | 82  | CDK8    | CDK8          | 138 | EphA8  | EPHA8         |
| 27 | SgK288   | ANKK1         | 83  | CDK9    | CDK9          | 139 | EphB1  | EPHB1         |
| 28 | ARAF     | ARAF          | 84  | CDKL1   | CDKL1         | 140 | EphB2  | EPHB2         |
| 29 | ATM      | ATM           | 85  | CDKL2   | CDKL2         | 141 | EphB3  | EPHB3         |
| 30 | ATR      | ATR           | 86  | CDKL3   | CDKL3         | 142 | EphB4  | EPHB4         |
| 31 | AurA     | AURKA         | 87  | CDKL4   | CDKL4         | 143 | EphB6  | EPHB6         |
| 32 | AurB     | AURKB         | 88  | CDKL5   | CDKL5         | 144 | ErbB2  | ERBB2         |
| 33 | AurC     | AURKC         | 89  | CHK1    | CHEK1         | 145 | ErbB3  | ERBB3         |
| 34 | AXL      | AXL           | 90  | CHK2    | CHEK2         | 146 | ErbB4  | ERBB4         |
| 35 | BCKDK    | BCKDK         | 91  | IKKa    | CHUK          | 147 | IRE1   | ERN1          |
| 36 | BCR      | BCR           | 92  | CRIK    | CIT           | 148 | IRE2   | ERN2          |
| 37 | BLK      | BLK           | 93  | CLK1    | CLK1          | 149 | FASTK  | FASTK         |
| 38 | BIKE     | BMP2K         | 94  | CLK2    | CLK2          | 150 | FER    | FER           |
| 39 | BMPR1A   | BMPR1A        | 95  | CLK3    | CLK3          | 151 | FES    | FES           |
| 40 | BMPR1B   | BMPR1B        | 96  | CLK4    | CLK4          | 152 | FGFR1  | FGFR1         |
| 41 | BMPR2    | BMPR2         | 97  | CRK7    | CRKRS         | 153 | FGFR2  | FGFR2         |
| 42 | BMX      | BMX           | 98  | FMS     | CSF1R         | 154 | FGFR3  | FGFR3         |
| 43 | BRAF     | BRAF          | 99  | CSK     | CSK           | 155 | FGFR4  | FGFR4         |
| 44 | BRD2     | BRD2          | 100 | CK1a    | CSNK1A1       | 156 | FGR    | FGR           |
| 45 | BRD3     | BRD3          | 101 | CK1a2   | CSNK1A1L      | 157 | SgK196 | FLJ23356      |
| 46 | BRD4     | BRD4          | 102 | CK1d    | CSNK1D        | 158 | SgK494 | FLJ25006      |
| 47 | BRDT     | BRDT          | 103 | CK1e    | CSNK1E        | 159 | FLT1   | FLT1          |
| 48 | BRSK1    | BRSK1         | 104 | CK1g1   | CSNK1G1       | 160 | FLT3   | FLT3          |
| 49 | BRSK2    | BRSK2         | 105 | CK1g2   | CSNK1G2       | 161 | FLT4   | FLT4          |
| 50 | BTK      | BTK           | 106 | CK1g3   | CSNK1G3       | 162 | FRAP   | FRAP1         |
| 51 | BUB1     | BUB1          | 107 | CK2a1   | CSNK2A1       | 163 | FRK    | FRK           |
| 52 | BUBR1    | BUB1B         | 108 | CK2a2   | CSNK2A2       | 164 | FYN    | FYN           |
| 53 | SgK071   | C9orf96       | 109 | DAPK1   | DAPK1         | 165 | GAK    | GAK           |
| 54 | ADCK3    | CABC1         | 110 | DAPK2   | DAPK2         | 166 | RHOK   | GRK1          |
| 55 | CaMK1a   | CAMK1         | 111 | DAPK3   | DAPK3         | 167 | GPRK4  | GRK4          |
| 56 | CaMK1d   | CAMK1D        | 112 | DCLK1   | DCAMKL1       | 168 | GPRK5  | GRK5          |

| #   | Name   | Entrez_Symbol | #   | Name     | Entrez_Symbol | #   | Name     | Entrez_Symbol |
|-----|--------|---------------|-----|----------|---------------|-----|----------|---------------|
| 169 | GPRK6  | GRK6          | 226 | MAP2K4   | MAP2K4        | 283 | caMLCK   | MLCK          |
| 170 | GPRK7  | GRK7          | 227 | MAP2K5   | MAP2K5        | 284 | MLKL     | MLKL          |
| 171 | Haspin | GSG2          | 228 | MAP2K6   | MAP2K6        | 285 | MOS      | MOS           |
| 172 | GSK3A  | GSK3A         | 229 | MAP2K7   | MAP2K7        | 286 | RON      | MST1R         |
| 173 | GSK3B  | GSK3B         | 230 | MAP3K1   | MAP3K1        | 287 | MUSK     | MUSK          |
| 174 | HSER   | GUCY2C        | 231 | MLK2     | MAP3K10       | 288 | smMLCK   | MYLK          |
| 175 | CYGD   | GUCY2D        | 232 | MLK3     | MAP3K11       | 289 | skMLCK   | MYLK2         |
| 176 | CYGF   | GUCY2F        | 233 | DLK      | MAP3K12       | 290 | MYO3A    | MYO3A         |
| 177 | HCK    | HCK           | 234 | LZK      | MAP3K13       | 291 | MYO3B    | MYO3B         |
| 178 | HIPK1  | HIPK1         | 235 | NIK      | MAP3K14       | 292 | NEK1     | NEK1          |
| 179 | HIPK2  | HIPK2         | 236 | MAP3K7   | MAP3K15       | 293 | NEK10    | NEK10         |
| 180 | HIPK3  | HIPK3         | 237 | MAP3K2   | MAP3K2        | 294 | NEK11    | NEK11         |
| 181 | HIPK4  | HIPK4         | 238 | MAP3K3   | MAP3K3        | 295 | NEK2     | NEK2          |
| 182 | H11    | HSPB8         | 239 | MAP3K4   | MAP3K4        | 296 | NEK3     | NEK3          |
| 183 | HUNK   | HUNK          | 240 | MAP3K5   | MAP3K5        | 297 | NEK4     | NEK4          |
| 184 | ICK    | ICK           | 241 | MAP3K6   | MAP3K6        | 298 | NEK5     | NEK5          |
| 185 | IGF1R  | IGF1R         | 242 | TAK1     | MAP3K7        | 299 | NEK6     | NEK6          |
| 186 | IKKb   | IKBKB         | 243 | COT      | MAP3K8        | 300 | NEK7     | NEK7          |
| 187 | IKKe   | IKBKE         | 244 | MLK1     | MAP3K9        | 301 | NEK8     | NEK8          |
| 188 | ILK    | ILK           | 245 | HPK1     | MAP4K1        | 302 | NEK9     | NEK9          |
| 189 | INSR   | INSR          | 246 | GCK      | MAP4K2        | 303 | NLK      | NLK           |
| 190 | IRR    | INSRR         | 247 | KHS2     | MAP4K3        | 304 | ANPa     | NPR1          |
| 191 | IRAK1  | IRAK1         | 248 | HGK      | MAP4K4        | 305 | ANPb     | NPR2          |
| 192 | IRAK2  | IRAK2         | 249 | KHS1     | MAP4K5        | 306 | NRBP1    | NRBP1         |
| 193 | IRAK3  | IRAK3         | 250 | Erk2     | MAPK1         | 307 | NRBP2    | NRBP2         |
| 194 | IRAK4  | IRAK4         | 251 | JNK3     | MAPK10        | 308 | NRK      | NRK           |
| 195 | ITK    | ITK           | 252 | p38b     | MAPK11        | 309 | TRKA     | NTRK1         |
| 196 | JAK1   | JAK1          | 253 | p38g     | MAPK12        | 310 | TRKB     | NTRK2         |
| 197 | JAK2   | JAK2          | 254 | p38d     | MAPK13        | 311 | TRKC     | NTRK3         |
| 198 | JAK3   | JAK3          | 255 | p38a     | MAPK14        | 312 | NuaK1    | NUAK1         |
| 199 | Trad   | KALRN         | 256 | Erk7     | MAPK15        | 313 | NuaK2    | NUAK2         |
| 200 | KDR    | KDR           | 257 | Erk1     | MAPK3         | 314 | Obscn    | OBSCN         |
| 201 | QSK    | KIAA0999      | 258 | Erk4     | MAPK4         | 315 | OSR1     | OXSR1         |
| 202 | MLK4   | KIAA1804      | 259 | Erk3     | MAPK6         | 316 | PAK1     | PAK1          |
| 203 | SgK269 | KIAA2002      | 260 | Erk5     | MAPK7         | 317 | PAK2     | PAK2          |
| 204 | KIT    | KIT           | 261 | JNK1     | MAPK8         | 318 | PAK3     | PAK3          |
| 205 | KSR1   | KSR1          | 262 | JNK2     | MAPK9         | 319 | PAK4     | PAK4          |
| 206 | KSR2   | KSR2          | 263 | MAPKAPK2 | MAPKAPK2      | 320 | PAK6     | PAK6          |
| 207 | LATS1  | LATS1         | 264 | MAPKAPK3 | MAPKAPK3      | 321 | PAK5     | PAK7          |
| 208 | LATS2  | LATS2         | 265 | MAPKAPK5 | MAPKAPK5      | 322 | PASK     | PASK          |
| 209 | LCK    | LCK           | 266 | MARK1    | MARK1         | 323 | PBK      | PBK           |
| 210 | LIMK1  | LIMK1         | 267 | MARK2    | MARK2         | 324 | PCTAIRE1 | PCTK1         |
| 211 | LIMK2  | LIMK2         | 268 | MARK3    | MARK3         | 325 | PCTAIRE2 | PCTK2         |
| 212 | LMR2   | LMTK2         | 269 | MARK4    | MARK4         | 326 | PCTAIRE3 | PCTK3         |
| 213 | MAST4  | LOC375449     | 270 | MAST1    | MAST1         | 327 | PDGFRa   | PDGFRA        |
| 214 | SgK069 | LOC646643     | 271 | MAST2    | MAST2         | 328 | PDGFRb   | PDGFRB        |
| 215 | SPEG   | LOC729871     | 272 | MAST3    | MAST3         | 329 | CLIK1L   | PDIK1L        |
| 216 | SgK493 | LOC91461      | 273 | MASTL    | MASTL         | 330 | PDHK1    | PDK1          |
| 217 | LRRK1  | LRRK1         | 274 | CTK      | MATK          | 331 | PDHK2    | PDK2          |
| 218 | LRRK2  | LRRK2         | 275 | MELK     | MELK          | 332 | PDHK3    | PDK3          |
| 219 | LTK    | LTK           | 276 | MER      | MERTK         | 333 | PDHK4    | PDK4          |
| 220 | STLK5  | LYK5          | 277 | MET      | MET           | 334 | PDK1     | PDPK1         |
| 221 | LYN    | LYN           | 278 | TBCK     | MGC16169      | 335 | PFTAIRE1 | PFTK1         |
| 222 | MAK    | MAK           | 279 | NIM1     | MGC42105      | 336 | PHKg1    | PHKG1         |
| 223 | MAP2K1 | MAP2K1        | 280 | MINK     | MINK1         | 337 | PHKg2    | PHKG2         |
| 224 | MAP2K2 | MAP2K2        | 281 | MNK1     | MKNK1         | 338 | PIK3R4   | PIK3R4        |
| 225 | MAP2K3 | MAP2K3        | 282 | MNK2     | MKNK2         | 339 | PIM1     | PIM1          |

| #   | Name   | Entrez_Symbol | #   | Name     | Entrez_Symbol | #   | Name   | Entrez_Symbol |
|-----|--------|---------------|-----|----------|---------------|-----|--------|---------------|
| 340 | PIM2   | PIM2          | 397 | ROR2     | ROR2          | 454 | TAO1   | TAOK1         |
| 341 | PIM3   | PIM3          | 398 | ROS      | ROS1          | 455 | TAO2   | TAOK2         |
| 342 | PINK1  | PINK1         | 399 | SgK085   | RP11-145H9.1  | 456 | TAO3   | TAOK3         |
| 343 | MYT1   | PKMYT1        | 400 | MST4     | RP6-213H19.1  | 457 | TBK1   | TBK1          |
| 344 | PKN1   | PKN1          | 401 | RSK3     | RPS6KA1       | 458 | TEC    | TEC           |
| 345 | PKN2   | PKN2          | 402 | RSK1     | RPS6KA2       | 459 | TIE2   | TEK           |
| 346 | PKN3   | PKN3          | 403 | RSK2     | RPS6KA3       | 460 | TESK1  | TESK1         |
| 347 | PLK1   | PLK1          | 404 | MSK2     | RPS6KA4       | 461 | TESK2  | TESK2         |
| 348 | PLK2   | PLK2          | 405 | MSK1     | RPS6KA5       | 462 | SgK307 | TEX14         |
| 349 | PLK3   | PLK3          | 406 | RSK4     | RPS6KA6       | 463 | TGFbR1 | TGFBR1        |
| 350 | PLK4   | PLK4          | 407 | p70S6K   | RPS6KB1       | 464 | TGFbR2 | TGFBR2        |
| 351 | CaMK1b | PNCK          | 408 | p70S6Kb  | RPS6KB2       | 465 | TIE1   | TIE1          |
| 352 | AMPKa1 | PRKAA1        | 409 | RSKL1    | RPS6KC1       | 466 | TLK1   | TLK1          |
| 353 | AMPKa2 | PRKAA2        | 410 | RSKL2    | RPS6KL1       | 467 | TLK2   | TLK2          |
| 354 | PKACa  | PRKACA        | 411 | RYK      | RYK           | 468 | TNIK   | TNIK          |
| 355 | PKACb  | PRKACB        | 412 | SBK      | SBK1          | 469 | TNK1   | TNK1          |
| 356 | PKACg  | PRKACG        | 413 | SCYL1    | SCYL1         | 470 | ACK    | TNK2          |
| 357 | PKCa   | PRKCA         | 414 | SCYL2    | SCYL2         | 471 | HH498  | TNNI3K        |
| 358 | PKCb   | PRKCB1        | 415 | SCYL3    | SCYL3         | 472 | PRPK   | TP53RK        |
| 359 | PKCd   | PRKCD         | 416 | SGK1     | SGK           | 473 | Trb1   | TRIB1         |
| 360 | PKCe   | PRKCE         | 417 | SGK2     | SGK2          | 474 | Trb2   | TRIB2         |
| 361 | PKCg   | PRKCG         | 418 | SGK3     | SGK3          | 475 | Trb3   | TRIB3         |
| 362 | PKCh   | PRKCH         | 419 | SLK      | SLK           | 476 | TIF1a  | TRIM24        |
| 363 | PKCi   | PRKCI         | 420 | SMG1     | SMG1          | 477 | TIF1b  | TRIM28        |
| 364 | PKCt   | PRKCCQ        | 421 | SIK      | SNF1LK        | 478 | TIF1g  | TRIM33        |
| 365 | PKCz   | PRKCCZ        | 422 | QIK      | SNF1LK2       | 479 | Trio   | TRIO          |
| 366 | PKD1   | PRKD1         | 423 | SNRK     | SNRK          | 480 | ChaK2  | TRPM6         |
| 367 | PKD2   | PRKD2         | 424 | SRC      | SRC           | 481 | ChaK1  | TRPM7         |
| 368 | PKD3   | PRKD3         | 425 | SRM      | SRMS          | 482 | TRRAP  | TRRAP         |
| 369 | DNAPK  | PRKDC         | 426 | SRPK1    | SRPK1         | 483 | TSSK1  | TSSK1B        |
| 370 | PKG1   | PRKG1         | 427 | SRPK2    | SRPK2         | 484 | TSSK2  | TSSK2         |
| 371 | PKG2   | PRKG2         | 428 | MSSK1    | SRPK3         | 485 | TSSK3  | TSSK3         |
| 372 | PRKX   | PRKX          | 429 | LOK      | STK10         | 486 | TSSK4  | TSSK4         |
| 373 | PRKY   | PRKY          | 430 | LKB1     | STK11         | 487 | SSTK   | TSSK6         |
| 374 | PRP4   | PRPF4B        | 431 | MPSK1    | STK16         | 488 | TTBK1  | TTBK1         |
| 375 | PSKH1  | PSKH1         | 432 | DRAK1    | STK17A        | 489 | TTBK2  | TTBK2         |
| 376 | PSKH2  | PSKH2         | 433 | DRAK2    | STK17B        | 490 | TTK    | TTK           |
| 377 | FAK    | PTK2          | 434 | G11      | STK19         | 491 | TTN    | TTN           |
| 378 | PYK2   | PTK2B         | 435 | MST3     | STK24         | 492 | TXK    | TXK           |
| 379 | BRK    | PTK6          | 436 | YSK1     | STK25         | 493 | TYK2   | TYK2          |
| 380 | CCK4   | PTK7          | 437 | MST2     | STK3          | 494 | TYRO3  | TYRO3         |
| 381 | Slob   | PXK           | 438 | SgK396   | STK31         | 495 | KIS    | UHMK1         |
| 382 | RAF1   | RAF1          | 439 | YANK1    | STK32A        | 496 | ULK1   | ULK1          |
| 383 | MOK    | RAGE          | 440 | YANK2    | STK32B        | 497 | ULK2   | ULK2          |
| 384 | RET    | RET           | 441 | YANK3    | STK32C        | 498 | ULK3   | ULK3          |
| 385 | RIOK1  | RIOK1         | 442 | STK33    | STK33         | 499 | ULK4   | ULK4          |
| 386 | RIOK2  | RIOK2         | 443 | CLIK1    | STK35         | 500 | VRK1   | VRK1          |
| 387 | RIOK3  | RIOK3         | 444 | Fused    | STK36         | 501 | VRK2   | VRK2          |
| 388 | RIPK1  | RIPK1         | 445 | NDR1     | STK38         | 502 | VRK3   | VRK3          |
| 389 | RIPK2  | RIPK2         | 446 | NDR2     | STK38L        | 503 | Wee1   | WEE1          |
| 390 | RIPK3  | RIPK3         | 447 | STLK3    | STK39         | 504 | Wnk1   | WNK1          |
| 391 | ANKRD3 | RIPK4         | 448 | MST1     | STK4          | 505 | Wnk2   | WNK2          |
| 392 | SgK496 | RIPK5         | 449 | SgK495   | STK40         | 506 | Wnk3   | WNK3          |
| 393 | RNAsel | RNASEL        | 450 | SuRTK106 | STYK1         | 507 | Wnk4   | WNK4          |
| 394 | ROCK1  | ROCK1         | 451 | SYK      | SYK           | 508 | YES    | YES1          |
| 395 | ROCK2  | ROCK2         | 452 | TAF1     | TAF1          | 509 | MAP3K8 | YSK4          |
| 396 | ROR1   | ROR1          | 453 | TAF1L    | TAF1L         | 510 | ZAK    | ZAK           |
|     |        |               |     |          |               | 511 | ZAP70  | ZAP70         |



Supplementary Table S6.

Kinase gene alterations in HCC Cell Lines<sup>a</sup>

| No. | Gene  | Chr | RefSeq <sup>b</sup> | cDNA              | Amino acid       | Type                   | SNU449 | HUH6 | JHH7 | HuH7 | SKHep1 | JHH5 | C3A | HepG2 | JHH4 | huH1 | HLE | SNU398 | SNU475 | HLF | Alex | KIM1 | JHH1 | SNU182 | SNU423 | SNU378 |   |
|-----|-------|-----|---------------------|-------------------|------------------|------------------------|--------|------|------|------|--------|------|-----|-------|------|------|-----|--------|--------|-----|------|------|------|--------|--------|--------|---|
| 1   | TTN   | 2   | NM_133432           | c.G77113A         | p.D25705N        | nonsynonymous SNV      | -      | -    | -    | -    | ○      | -    | -   | -     | -    | -    | -   | -      | -      | -   | -    | -    | -    | -      | -      | -      |   |
|     | TTN   | 2   | NM_133432           | c.T71588C         | p.L23863P        | nonsynonymous SNV      | ○      | -    | -    | -    | -      | -    | -   | -     | -    | -    | -   | -      | -      | -   | -    | -    | -    | -      | -      | -      |   |
|     | TTN   | 2   | NM_133432           | c.G70443A         | p.W23481X        | stopgain SNV           | -      | -    | -    | -    | -      | ○    | -   | -     | -    | -    | -   | -      | -      | -   | -    | -    | -    | -      | -      | -      |   |
|     | TTN   | 2   | NM_133432           | c.G66505T         | p.V22169L        | nonsynonymous SNV      | -      | ○    | -    | -    | -      | -    | -   | -     | -    | -    | -   | -      | -      | -   | -    | -    | -    | -      | -      | -      |   |
|     | TTN   | 2   | NM_133432           | c.62007_62008insG | p.R20669fs       | frameshift insertion   | -      | -    | -    | -    | ○      | -    | -   | -     | -    | -    | -   | ○      | -      | ○   | -    | -    | -    | -      | ○      | -      |   |
|     | TTN   | 2   | NM_133432           | c.60574_60576del  | p.20192_20192del | nonframeshift deletion | -      | -    | -    | -    | -      | -    | -   | -     | ○    | -    | -   | -      | -      | -   | -    | -    | -    | -      | -      | -      |   |
|     | TTN   | 2   | NM_133432           | c.G60069T         | p.W20023C        | nonsynonymous SNV      | -      | -    | -    | -    | -      | -    | -   | -     | -    | -    | -   | -      | -      | -   | -    | -    | -    | -      | -      | ○      |   |
|     | TTN   | 2   | NM_133432           | c.C58586G         | p.S19529C        | nonsynonymous SNV      | -      | -    | -    | -    | -      | -    | -   | -     | -    | -    | -   | -      | -      | -   | -    | -    | -    | -      | ○      | -      |   |
|     | TTN   | 2   | NM_133432           | c.C45917T         | p.P15306L        | nonsynonymous SNV      | -      | -    | -    | -    | -      | -    | -   | -     | -    | -    | -   | -      | -      | -   | -    | ○    | -    | -      | -      | -      |   |
|     | TTN   | 2   | NM_133432           | c.A40264G         | p.T13422A        | nonsynonymous SNV      | -      | -    | ○    | -    | -      | -    | -   | -     | -    | -    | -   | -      | -      | -   | -    | -    | -    | -      | -      | -      |   |
|     | TTN   | 2   | NM_133432           | c.T40097C         | p.I13366T        | nonsynonymous SNV      | -      | -    | -    | -    | ○      | -    | -   | -     | -    | -    | -   | -      | -      | -   | -    | -    | -    | -      | -      | -      |   |
|     | TTN   | 2   | NM_133432           | c.A39550G         | p.T13184A        | nonsynonymous SNV      | -      | -    | -    | -    | -      | -    | -   | -     | ○    | -    | -   | -      | -      | -   | -    | -    | -    | -      | -      | -      |   |
|     | TTN   | 2   | NM_133432           | c.A32462G         | p.N10821S        | nonsynonymous SNV      | -      | ○    | -    | -    | -      | -    | -   | -     | -    | -    | -   | -      | -      | -   | -    | -    | -    | -      | -      | -      |   |
|     | TTN   | 2   | NM_133432           | c.C27845G         | p.T9282S         | nonsynonymous SNV      | -      | -    | -    | -    | -      | -    | -   | ○     | -    | -    | -   | -      | -      | -   | -    | -    | -    | -      | -      | -      |   |
|     | TTN   | 2   | NM_133432           | c.G23632A         | p.E7878K         | nonsynonymous SNV      | -      | -    | -    | -    | ○      | -    | -   | -     | -    | -    | -   | -      | -      | -   | -    | -    | -    | -      | -      | -      |   |
|     | TTN   | 2   | NM_133432           | c.A18388G         | p.I6130V         | nonsynonymous SNV      | -      | -    | -    | -    | -      | -    | -   | -     | -    | ○    | -   | -      | -      | -   | -    | -    | -    | -      | -      | -      |   |
|     | TTN   | 2   | NM_133432           | c.G16597C         | p.D5533H         | nonsynonymous SNV      | -      | -    | -    | -    | ○      | -    | -   | -     | -    | -    | -   | -      | -      | -   | -    | -    | -    | -      | -      | -      |   |
|     | TTN   | 2   | NM_133432           | c.A9128G          | p.Q3043R         | nonsynonymous SNV      | -      | -    | -    | -    | -      | -    | -   | -     | ○    | -    | -   | -      | -      | -   | -    | -    | -    | -      | -      | -      |   |
|     | TTN   | 2   | NM_133432           | c.T8795C          | p.I2932T         | nonsynonymous SNV      | -      | -    | -    | -    | -      | -    | -   | -     | -    | -    | -   | -      | -      | -   | -    | -    | -    | -      | ○      | -      |   |
|     | TTN   | 2   | NM_133432           | c.C7931T          | p.T2644I         | nonsynonymous SNV      | -      | -    | -    | -    | -      | -    | -   | -     | -    | -    | -   | ○      | -      | -   | -    | -    | -    | -      | -      | -      |   |
|     | TTN   | 2   | NM_133432           | c.A6339C          | p.E2113D         | nonsynonymous SNV      | -      | -    | -    | -    | -      | -    | -   | -     | -    | -    | -   | ○      | -      | -   | -    | -    | -    | -      | -      | -      |   |
|     | TTN   | 2   | NM_133432           | c.A3590C          | p.Q1197P         | nonsynonymous SNV      | -      | -    | ○    | -    | -      | -    | -   | -     | -    | -    | -   | -      | -      | -   | -    | -    | -    | -      | -      | -      |   |
|     | TTN   | 2   | NM_133432           | c.A665T           | p.E222V          | nonsynonymous SNV      | -      | -    | -    | -    | -      | -    | -   | -     | -    | -    | -   | -      | -      | -   | -    | -    | -    | -      | ○      | -      |   |
| 2   | OBSCN | 1   | NM_001098623        | c.C959T           | p.T320I          | nonsynonymous SNV      | -      | -    | -    | -    | -      | -    | -   | -     | -    | -    | -   | -      | -      | -   | ○    | -    | -    | -      | -      | -      |   |
|     | OBSCN | 1   | NM_001098623        | c.G1408T          | p.A470S          | nonsynonymous SNV      | ○      | -    | -    | -    | -      | -    | -   | -     | -    | -    | -   | -      | -      | -   | -    | -    | -    | -      | -      | -      |   |
|     | OBSCN | 1   | NM_001098623        | c.G2539A          | p.E847K          | nonsynonymous SNV      | -      | -    | -    | -    | -      | -    | -   | -     | -    | ○    | -   | -      | -      | -   | -    | -    | -    | -      | -      | -      |   |
|     | OBSCN | 1   | NM_001098623        | c.C5078T          | p.A1693V         | nonsynonymous SNV      | -      | -    | -    | -    | -      | -    | -   | -     | ○    | -    | -   | -      | -      | -   | -    | -    | -    | -      | -      | -      |   |
|     | OBSCN | 1   | NM_001098623        | c.G5272C          | p.E1758Q         | nonsynonymous SNV      | -      | -    | -    | -    | -      | ○    | -   | -     | -    | -    | -   | -      | -      | ○   | -    | -    | -    | -      | -      | -      |   |
|     | OBSCN | 1   | NM_001098623        | c.T6816G          | p.F2272L         | nonsynonymous SNV      | -      | -    | -    | -    | ○      | -    | -   | -     | -    | -    | -   | -      | -      | -   | -    | -    | -    | -      | -      | -      |   |
|     | OBSCN | 1   | NM_001098623        | c.C7882T          | p.R2628C         | nonsynonymous SNV      | -      | -    | -    | -    | -      | -    | -   | -     | -    | -    | -   | -      | -      | ○   | -    | -    | -    | -      | -      | -      |   |
|     | OBSCN | 1   | NM_001098623        | c.C9473T          | p.T3158I         | nonsynonymous SNV      | -      | -    | -    | -    | -      | -    | -   | -     | -    | -    | -   | -      | -      | -   | ○    | -    | -    | -      | -      | -      |   |
|     | OBSCN | 1   | NM_001098623        | c.C10936T         | p.R3646W         | nonsynonymous SNV      | -      | ○    | -    | -    | -      | -    | -   | -     | -    | -    | -   | -      | -      | -   | -    | -    | -    | -      | -      | -      |   |
|     | OBSCN | 1   | NM_001098623        | c.T12574G         | p.W4192G         | nonsynonymous SNV      | -      | -    | -    | -    | -      | -    | -   | -     | -    | -    | -   | -      | -      | -   | -    | -    | -    | ○      | -      | -      |   |
|     | OBSCN | 1   | NM_001098623        | c.C13820T         | p.P4607L         | nonsynonymous SNV      | -      | -    | -    | -    | -      | -    | -   | -     | -    | -    | -   | -      | -      | ○   | -    | -    | -    | -      | -      | -      |   |
|     | OBSCN | 1   | NM_001098623        | c.G14003A         | p.R4668Q         | nonsynonymous SNV      | -      | -    | -    | -    | -      | -    | -   | -     | -    | -    | -   | -      | -      | -   | -    | -    | -    | ○      | -      | -      |   |
|     | OBSCN | 1   | NM_001098623        | c.C17573A         | p.A5858E         | nonsynonymous SNV      | -      | -    | -    | -    | -      | -    | -   | -     | -    | -    | -   | -      | -      | -   | ○    | -    | -    | -      | -      | -      |   |
|     | OBSCN | 1   | NM_052843           | c.19093_19094insC | p.T6365fs        | frameshift insertion   | -      | -    | -    | -    | -      | -    | -   | -     | -    | -    | -   | -      | ○      | -   | -    | -    | -    | -      | -      | -      |   |
| 3   | EPHA1 | 7   | NM_005232           | c.T2743C          | p.Y915H          | nonsynonymous SNV      | -      | -    | -    | -    | -      | -    | -   | -     | -    | ○    | -   | -      | -      | -   | -    | -    | -    | -      | -      | -      |   |
|     | EPHA1 | 7   | NM_005232           | c.G2155T          | p.D719Y          | nonsynonymous SNV      | -      | -    | ○    | -    | -      | -    | -   | -     | -    | -    | -   | -      | -      | -   | -    | -    | -    | -      | -      | -      |   |
|     | EPHA1 | 7   | NM_005232           | c.C772G           | p.P258A          | nonsynonymous SNV      | -      | -    | -    | -    | -      | -    | -   | -     | -    | -    | -   | -      | -      | -   | -    | ○    | -    | -      | -      | -      |   |
|     | EPHA1 | 7   | NM_005232           | c.T770G           | p.V257G          | nonsynonymous SNV      | -      | ○    | ○    | ○    | ○      | ○    | ○   | ○     | ○    | -    | ○   | ○      | -      | ○   | ○    | ○    | ○    | ○      | ○      | -      | ○ |
|     | EPHA1 | 7   | NM_005232           | c.A701C           | p.H234P          | nonsynonymous SNV      | -      | -    | -    | -    | -      | -    | -   | -     | -    | -    | -   | -      | -      | -   | ○    | -    | -    | -      | -      | -      |   |
|     | EPHA1 | 7   | NM_005232           | c.A688G           | p.T230A          | nonsynonymous SNV      | -      | -    | ○    | ○    | ○      | ○    | ○   | -     | -    | ○    | -   | -      | -      | ○   | ○    | ○    | ○    | -      | ○      | -      | - |
| 4   | ROS1  | 6   | NM_002944           | c.G6878A          | p.G2293D         | nonsynonymous SNV      | -      | -    | -    | -    | -      | -    | -   | -     | -    | -    | -   | -      | -      | -   | -    | -    | ○    | -      | -      | -      |   |

|    |        |    |           |                |                |                        |   |   |   |   |   |   |   |   |   |   |   |   |   |   |   |   |   |   |   |   |   |
|----|--------|----|-----------|----------------|----------------|------------------------|---|---|---|---|---|---|---|---|---|---|---|---|---|---|---|---|---|---|---|---|---|
|    | ROS1   | 6  | NM_002944 | c.C6847A       | p.Q2283K       | nonsynonymous SNV      | - | - | - | - | - | - | - | - | - | - | - | - | - | - | - | - | - | ○ | - | - |   |
|    | ROS1   | 6  | NM_002944 | c.A5689G       | p.T1897A       | nonsynonymous SNV      | - | - | - | - | - | - | - | - | - | - | - | - | - | - | - | - | - | - | ○ | - |   |
|    | ROS1   | 6  | NM_002944 | c.T3325G       | p.S1109A       | nonsynonymous SNV      | - | - | - | ○ | - | - | - | - | - | - | - | - | - | - | - | - | - | - | - | - |   |
|    | ROS1   | 6  | NM_002944 | c.C848A        | p.S283Y        | nonsynonymous SNV      | - | - | - | - | - | ○ | - | - | - | - | - | - | - | - | - | - | - | - | - | - |   |
|    | ROS1   | 6  | NM_002944 | c.T397C        | p.W133R        | nonsynonymous SNV      | - | - | ○ | - | - | - | - | - | - | - | - | - | - | - | - | - | - | - | - | - |   |
| 5  | KSR2   | 12 | NM_173598 | c.C2350A       | p.L784M        | nonsynonymous SNV      | - | - | - | - | - | - | - | - | - | - | - | - | ○ | - | - | - | - | - | - | - |   |
|    | KSR2   | 12 | NM_173598 | c.C479T        | p.P160L        | nonsynonymous SNV      | - | - | - | - | - | - | - | - | - | - | - | - | - | - | ○ | - | - | - | - | - |   |
|    | KSR2   | 12 | NM_173598 | c.C353A        | p.S118Y        | nonsynonymous SNV      | - | - | - | - | - | - | - | - | ○ | - | - | ○ | - | - | - | - | - | - | - | - |   |
|    | KSR2   | 12 | NM_173598 | c.G262T        | p.E88X         | stopgain SNV           | - | - | - | - | - | - | - | - | - | - | - | - | ○ | - | - | - | - | - | - | - |   |
|    | KSR2   | 12 | NM_173598 | c.G166C        | p.E56Q         | nonsynonymous SNV      | - | - | - | - | - | - | - | - | - | - | - | - | - | - | - | - | - | ○ | - | - |   |
| 6  | MAP3K4 | 6  | NM_005922 | c.C533T        | p.S178L        | nonsynonymous SNV      | - | - | - | - | - | - | - | - | - | - | - | - | - | - | - | ○ | - | - | - | - |   |
|    | MAP3K4 | 6  | NM_005922 | c.G2719A       | p.G907S        | nonsynonymous SNV      | - | - | - | - | - | - | - | - | ○ | - | - | - | - | - | - | - | - | - | - | - |   |
|    | MAP3K4 | 6  | NM_005922 | c.A2996G       | p.N999S        | nonsynonymous SNV      | - | - | - | - | - | - | - | - | - | - | - | - | - | - | - | - | ○ | - | - | - |   |
|    | MAP3K4 | 6  | NM_005922 | c.3566_3568del | p.1189_1190del | nonframeshift deletion | ○ | ○ | ○ | ○ | - | ○ | ○ | ○ | ○ | - | ○ | ○ | ○ | ○ | ○ | ○ | ○ | ○ | ○ | ○ | ○ |
|    | MAP3K4 | 6  | NM_005922 | c.G3656A       | p.S1219N       | nonsynonymous SNV      | - | - | - | - | - | - | - | - | ○ | - | - | - | - | - | - | - | - | - | - | - |   |
| 7  | NTRK1  | 1  | NM_002529 | c.A748C        | p.T250P        | nonsynonymous SNV      | ○ | - | - | - | - | - | - | - | - | - | - | - | - | - | - | - | - | - | - | - |   |
|    | NTRK1  | 1  | NM_002529 | c.T902C        | p.I301T        | nonsynonymous SNV      | - | - | - | - | - | - | - | - | - | - | - | - | ○ | - | - | - | - | - | - | - |   |
|    | NTRK1  | 1  | NM_002529 | c.T2048G       | p.V683G        | nonsynonymous SNV      | - | - | - | - | - | - | - | - | - | - | - | - | - | - | ○ | - | - | - | - | - |   |
|    | NTRK1  | 1  | NM_002529 | c.G2212A       | p.D738N        | nonsynonymous SNV      | - | - | - | - | - | - | - | - | - | - | ○ | - | - | - | - | - | - | - | - | - |   |
|    | NTRK1  | 1  | NM_002529 | c.A2378C       | p.D793A        | nonsynonymous SNV      | ○ | - | - | - | - | - | - | - | - | - | - | - | - | - | - | - | - | - | - | - |   |
| 8  | ALK    | 2  | NM_004304 | c.G3630T       | p.E1210D       | nonsynonymous SNV      | - | - | - | - | - | - | - | - | - | ○ | - | - | - | - | - | - | - | - | - | - |   |
|    | ALK    | 2  | NM_004304 | c.A3089C       | p.H1030P       | nonsynonymous SNV      | - | ○ | ○ | ○ | ○ | - | ○ | ○ | ○ | ○ | ○ | ○ | - | ○ | ○ | ○ | ○ | ○ | ○ | ○ | ○ |
|    | ALK    | 2  | NM_004304 | c.T1508G       | p.V503G        | nonsynonymous SNV      | - | - | - | - | ○ | - | - | - | - | ○ | - | - | ○ | - | - | - | - | ○ | - | - | - |
|    | ALK    | 2  | NM_004304 | c.T843A        | p.H281Q        | nonsynonymous SNV      | ○ | - | - | - | - | - | - | - | - | - | - | - | - | - | - | - | - | - | - | - |   |
| 9  | EPHA2  | 1  | NM_004431 | c.G2845C       | p.V949L        | nonsynonymous SNV      | - | - | - | - | - | - | - | - | - | - | - | - | - | - | ○ | - | - | - | - | - |   |
|    | EPHA2  | 1  | NM_004431 | c.A769C        | p.I257L        | nonsynonymous SNV      | - | - | - | - | - | - | - | - | - | - | - | - | ○ | - | - | - | - | - | - | - |   |
|    | EPHA2  | 1  | NM_004431 | c.766_767insG  | p.P256fs       | frameshift insertion   | - | - | - | - | - | - | - | - | - | - | ○ | - | - | - | - | - | - | - | - | - |   |
|    | EPHA2  | 1  | NM_004431 | c.T764G        | p.V255G        | nonsynonymous SNV      | - | ○ | ○ | ○ | ○ | ○ | ○ | ○ | ○ | ○ | ○ | ○ | ○ | - | ○ | ○ | ○ | ○ | - | ○ | ○ |
| 10 | INSR   | 19 | NM_000208 | c.T3661G       | p.S1221A       | nonsynonymous SNV      | ○ | ○ | - | ○ | - | - | ○ | - | ○ | ○ | - | - | ○ | ○ | - | - | ○ | - | - | - |   |
|    | INSR   | 19 | NM_000208 | c.G3143A       | p.G1048D       | nonsynonymous SNV      | - | - | - | - | - | - | - | - | - | - | - | - | - | - | - | ○ | - | - | - | - |   |
|    | INSR   | 19 | NM_000208 | c.C1988G       | p.A663G        | nonsynonymous SNV      | - | ○ | - | - | - | - | - | - | - | - | - | - | - | - | ○ | - | ○ | - | - | - |   |
|    | INSR   | 19 | NM_000208 | c.C806T        | p.P269L        | nonsynonymous SNV      | - | - | - | - | - | - | - | - | - | - | - | - | - | - | - | - | - | ○ | - | - |   |
| 11 | MYLK   | 3  | NM_053031 | c.89_89del     | p.30_30del     | frameshift deletion    | ○ | - | - | - | - | - | - | - | - | - | - | - | - | - | - | - | - | - | - | - |   |
|    | MYLK   | 3  | NM_053026 | c.G2161C       | p.G721R        | nonsynonymous SNV      | - | - | - | - | - | - | - | - | - | - | - | - | - | ○ | - | - | - | - | - | - |   |
|    | MYLK   | 3  | NM_053026 | c.G617A        | p.R206H        | nonsynonymous SNV      | - | - | - | - | - | - | - | - | - | - | - | - | - | - | - | - | ○ | - | - | - |   |
|    | MYLK   | 3  | NM_053026 | c.G455A        | p.R152H        | nonsynonymous SNV      | ○ | - | - | - | - | - | - | - | - | - | - | - | - | - | - | - | - | - | - | - |   |
| 12 | PRKDC  | 8  | NM_006904 | c.G11221A      | p.V3741M       | nonsynonymous SNV      | - | ○ | - | - | - | - | - | - | - | - | - | - | - | - | - | - | - | - | - | - |   |
|    | PRKDC  | 8  | NM_006904 | c.C10466T      | p.P3489L       | nonsynonymous SNV      | - | - | - | - | - | - | ○ | ○ | - | - | - | - | - | - | - | - | - | - | - | - |   |
|    | PRKDC  | 8  | NM_006904 | c.6337_6339del | p.2113_2113del | nonframeshift deletion | ○ | - | - | - | - | - | - | - | - | - | - | - | - | - | - | - | - | - | - | - |   |
|    | PRKDC  | 8  | NM_006904 | c.419_430del   | p.140_144del   | nonframeshift deletion | - | - | - | - | - | - | - | - | - | - | - | - | - | - | ○ | - | - | - | - | - |   |
| 13 | SPEG   | 2  | NM_005876 | c.C2282A       | p.A761E        | nonsynonymous SNV      | - | - | - | - | - | - | - | - | - | - | - | - | - | ○ | - | - | - | - | - | - |   |
|    | SPEG   | 2  | NM_005876 | c.G2971A       | p.V991M        | nonsynonymous SNV      | - | - | ○ | - | - | - | - | - | - | - | - | - | - | - | - | - | - | - | - | - |   |
|    | SPEG   | 2  | NM_005876 | c.A3992G       | p.Q1331R       | nonsynonymous SNV      | - | - | - | - | - | - | - | - | ○ | - | - | - | - | - | - | - | - | - | - | - |   |
|    | SPEG   | 2  | NM_005876 | c.C8926A       | p.R2976S       | nonsynonymous SNV      | - | - | - | - | - | ○ | - | - | - | - | - | - | - | - | - | - | - | - | - | - |   |
| 14 | ACVR2A | 2  | NM_001616 | c.T234A        | p.C78X         | stopgain SNV           | - | - | - | - | - | - | - | - | ○ | - | - | - | - | - | - | - | - | - | - | - |   |
|    | ACVR2A | 2  | NM_001616 | c.C452T        | p.A151V        | nonsynonymous SNV      | - | - | - | - | - | - | - | - | - | - | - | - | ○ | - | - | - | - | - | - | - |   |
|    | ACVR2A | 2  | NM_001616 | c.A945C        | p.K315N        | nonsynonymous SNV      | - | ○ | ○ | ○ | - | - | ○ | ○ | ○ | - | - | - | - | ○ | - | ○ | - | - | - | ○ |   |









|     |         |    |              |                 |                |                      |   |   |   |   |   |   |   |   |   |   |   |   |   |   |   |   |   |   |   |   |
|-----|---------|----|--------------|-----------------|----------------|----------------------|---|---|---|---|---|---|---|---|---|---|---|---|---|---|---|---|---|---|---|---|
| 144 | PRKACB  | 1  | NM_001242858 | c.C738G         | p.F246L        | nonsynonymous SNV    | - | - | - | - | - | - | - | - | - | - | - | - | - | ○ | - | - | - | - | - |   |
| 145 | PRKACG  | 9  | NM_002732    | c.G565A         | p.A189T        | nonsynonymous SNV    | - | - | - | - | - | - | - | - | - | - | - | - | - | ○ | - | - | - | - | - |   |
| 146 | PRKCQ   | 10 | NM_006257    | c.A428G         | p.H143R        | nonsynonymous SNV    | - | - | - | - | - | ○ | - | - | - | - | - | - | - | - | - | - | - | - | - |   |
| 147 | PRKCZ   | 1  | NM_002744    | c.A295C         | p.T99P         | nonsynonymous SNV    | - | - | - | - | - | - | ○ | - | - | - | - | - | - | - | - | - | ○ | - | - |   |
| 148 | PTK2    | 8  | NM_153831    | c.3127_3131del  | p.1043_1044del | frameshift deletion  | - | - | - | - | - | ○ | - | - | - | - | - | - | - | - | - | - | - | - | - |   |
| 149 | RET     | 10 | NM_020630    | c.G1588A        | p.E530K        | nonsynonymous SNV    | - | ○ | - | - | - | - | - | - | - | - | - | - | - | - | - | - | - | - | - |   |
| 150 | RIPK4   | 21 | NM_020639    | c.C2296G        | p.L766V        | nonsynonymous SNV    | - | - | - | - | - | - | - | - | - | - | - | - | - | ○ | - | - | - | - | - |   |
| 151 | RNASEL  | 1  | NM_021133    | c.G1823A        | p.R608Q        | nonsynonymous SNV    | - | - | ○ | - | - | - | - | - | - | - | - | - | - | - | - | - | - | - | - |   |
| 152 | RPS6KA1 | 1  | NM_002953    | c.T214G         | p.S72A         | nonsynonymous SNV    | - | - | ○ | - | - | - | - | - | - | - | - | - | - | - | - | - | - | - | - |   |
| 153 | RPS6KB2 | 11 | NM_003952    | c.G1264A        | p.V422I        | nonsynonymous SNV    | - | ○ | - | - | - | - | - | - | - | - | - | - | - | - | - | - | - | - | - |   |
| 154 | RPS6KC1 | 1  | NM_001136138 | c.A2204G        | p.K735R        | nonsynonymous SNV    | - | - | - | - | - | - | - | ○ | - | - | - | - | - | - | - | - | - | - | - |   |
| 155 | SCYL1   | 11 | NM_001048218 | c.G163A         | p.E55K         | nonsynonymous SNV    | - | - | ○ | - | - | - | - | - | - | - | - | - | - | - | - | - | - | - | - |   |
| 156 | SCYL2   | 12 | NM_017988    | c.T767C         | p.M256T        | nonsynonymous SNV    | - | - | - | - | - | - | - | - | ○ | - | - | - | - | - | - | - | - | - | - |   |
| 157 | SGK2    | 20 | NM_016276    | c.A923C         | p.H308P        | nonsynonymous SNV    | - | ○ | - | - | - | ○ | ○ | ○ | - | ○ | ○ | - | - | ○ | ○ | ○ | - | - | - | ○ |
| 158 | SIK1    | 21 | NM_173354    | c.G1888A        | p.A630T        | nonsynonymous SNV    | - | - | - | - | - | - | - | - | - | - | - | - | - | ○ | - | - | - | - | - |   |
| 159 | SRPK1   | 6  | NM_003137    | c.G1427A        | p.G476E        | nonsynonymous SNV    | - | - | ○ | - | - | - | - | - | - | - | - | - | - | - | - | - | - | - | - |   |
| 160 | STK10   | 5  | NM_005990    | c.G2753A        | p.R918Q        | nonsynonymous SNV    | - | - | - | - | - | - | - | - | - | - | - | - | - | - | - | - | ○ | - | - |   |
| 161 | STK17B  | 2  | NM_004226    | c.A304T         | p.N102Y        | nonsynonymous SNV    | ○ | - | - | - | - | - | - | - | - | - | - | - | - | - | - | - | - | - | - |   |
| 162 | STK24   | 13 | NM_003576    | c.G310A         | p.D104N        | nonsynonymous SNV    | - | - | - | - | - | - | - | - | - | - | - | - | ○ | - | - | - | - | - | - |   |
| 163 | STK4    | 20 | NM_006282    | c.G350A         | p.R117Q        | nonsynonymous SNV    | - | - | - | - | - | - | - | - | ○ | - | - | - | - | - | - | - | - | - | - |   |
| 164 | STK40   | 1  | NM_032017    | c.769_770del    | p.257_257del   | frameshift deletion  | - | - | - | - | - | - | - | - | - | - | - | - | - | ○ | - | - | - | - | - |   |
| 165 | STYK1   | 12 | NM_018423    | c.A91G          | p.T31A         | nonsynonymous SNV    | - | - | - | - | - | - | - | - | - | - | - | - | - | ○ | - | - | - | - | - |   |
| 166 | TBCK    | 4  | NM_001163435 | c.G19A          | p.A7T          | nonsynonymous SNV    | - | - | ○ | - | - | - | - | - | - | - | - | - | - | - | - | - | - | - | - |   |
| 167 | TEK     | 9  | NM_000459    | c.A880G         | p.K294E        | nonsynonymous SNV    | ○ | ○ | ○ | ○ | ○ | ○ | ○ | - | ○ | - | - | ○ | - | - | - | - | ○ | ○ | ○ | - |
| 168 | TEX14   | 17 | NM_031272    | c.G3570C        | p.Q1190H       | nonsynonymous SNV    | - | - | - | - | - | - | - | - | - | - | - | - | - | - | ○ | - | - | - | - |   |
| 169 | TGFBR1  | 9  | NM_001130916 | c.G856C         | p.D286H        | nonsynonymous SNV    | - | - | - | - | - | - | - | - | - | - | - | - | - | - | - | - | ○ | - | - |   |
| 170 | TNK2    | 3  | NM_001010938 | c.C1814T        | p.P605L        | nonsynonymous SNV    | - | - | - | - | - | - | - | - | - | - | - | - | - | - | - | - | ○ | - | - |   |
| 171 | TRIB2   | 2  | NM_021643    | c.A494C         | p.H165P        | nonsynonymous SNV    | - | - | - | - | - | - | - | - | - | - | - | - | - | ○ | - | - | - | - | - |   |
| 172 | TRIM28  | 19 | NM_005762    | c.C2441T        | p.P814L        | nonsynonymous SNV    | - | - | - | - | - | - | - | - | - | - | - | - | - | ○ | - | - | - | - | - |   |
| 173 | TRIO    | 5  | NM_007118    | c.T7775C        | p.F2592S       | nonsynonymous SNV    | - | - | ○ | - | ○ | - | - | - | - | - | - | - | - | - | - | - | ○ | - | ○ |   |
| 174 | TRPM6   | 9  | NM_001177310 | c.C3733A        | p.P1245T       | nonsynonymous SNV    | - | - | - | - | - | - | - | - | - | - | - | - | - | - | - | - | - | - | ○ |   |
| 175 | TSSK4   | 14 | NM_174944    | c.T311A         | p.L104Q        | nonsynonymous SNV    | - | - | - | - | - | ○ | - | - | - | - | - | - | - | - | - | - | - | - | - |   |
| 176 | TTBK1   | 6  | NM_032538    | c.A295G         | p.N99D         | nonsynonymous SNV    | - | - | - | - | ○ | - | - | - | - | - | - | - | - | - | - | - | ○ | - | - |   |
| 177 | TYK2    | 19 | NM_003331    | c.1036_1037insG | p.N346fs       | frameshift insertion | ○ | ○ | - | ○ | ○ | - | - | ○ | - | - | - | ○ | ○ | ○ | - | ○ | - | ○ | ○ |   |
| 178 | TYRO3   | 15 | NM_006293    | c.G1135A        | p.A379T        | nonsynonymous SNV    | - | - | - | - | - | - | - | - | - | - | - | - | - | - | - | - | - | ○ | - |   |
| 179 | UHMK1   | 1  | NM_175866    | c.C29T          | p.A10V         | nonsynonymous SNV    | - | - | - | - | - | - | - | - | - | - | - | - | - | - | - | - | ○ | - | - |   |
| 180 | ULK2    | 17 | NM_014683    | c.2621delA      | p.Q874fs       | frameshift deletion  | - | - | - | - | - | - | - | - | - | - | - | - | - | - | - | - | ○ | - | - |   |
| 181 | ULK4    | 3  | NM_017886    | c.G3746A        | p.R1249Q       | nonsynonymous SNV    | - | - | - | - | - | - | - | - | - | - | - | - | - | - | - | - | - | - | ○ |   |
| 182 | VRK2    | 2  | NM_001130481 | c.G775A         | p.A259T        | nonsynonymous SNV    | - | - | - | - | - | - | - | - | - | - | - | - | - | - | - | - | ○ | - | - |   |
| 183 | WNK1    | 12 | NM_014823    | c.C4468G        | p.P1490A       | nonsynonymous SNV    | - | - | - | - | - | - | - | - | - | - | - | - | - | - | - | - | - | - | ○ |   |
| 184 | WNK2    | 9  | NM_006648    | c.G5350A        | p.V1784M       | nonsynonymous SNV    | - | - | - | - | - | - | - | - | ○ | - | - | - | - | - | - | - | - | - | - |   |
| 185 | WNK4    | 17 | NM_032387    | c.G2167A        | p.E723K        | nonsynonymous SNV    | - | - | - | - | - | - | - | - | - | - | - | - | - | - | - | - | - | ○ | - |   |
| 186 | YES1    | 18 | NM_005433    | c.G271C         | p.G91R         | nonsynonymous SNV    | - | - | - | - | ○ | - | - | - | - | - | - | - | - | - | - | - | - | - | - |   |

<sup>a</sup>The 20 HCC cell lines analyzed were SNU-449, HUH-6, JHH-7, SK-Hep1, JHH-5, C3A, HepG2, JHH-4, huH-1, HLE, SNU-398, SNU-475, HLF, Alexander, KIM-1, JHH-1, JHh-2, SNU-182, SNU-423 and SNU-387.

<sup>b</sup>RefSeq Accession number registered in the National Center for Biotechnology Information (NCBI) database (<http://www.ncbi.nlm.nih.gov/sites/entrez?db=gene>).

Abbreviation: Chr, chromosome

**Supplementary Table S7.**  
**mTOR and MAPK pathway gene alterations in the HCC cell lines**

| Gene symbol | Alternative name | rsID <sup>a</sup> | RefSeq ID <sup>b</sup> | Chr | Genome position | cDNA     | Amino acid | Cell lines |      |      |      |        |      |     |       |      |      |     |       |       |     |      |      |      |       |       |        |   |
|-------------|------------------|-------------------|------------------------|-----|-----------------|----------|------------|------------|------|------|------|--------|------|-----|-------|------|------|-----|-------|-------|-----|------|------|------|-------|-------|--------|---|
|             |                  |                   |                        |     |                 |          |            | SNU44      | HUH6 | JHH7 | HuH7 | SKHep1 | JHH5 | C3A | HepG2 | JHH4 | huH1 | HLE | SNU39 | SNU47 | HLF | Alex | KIM1 | JHH1 | SNU18 | SNU42 | SNU378 |   |
| BRAF        |                  | rs113488022       | NM_004333              | 7   | 140453136       | c.T1799A | p.V600E    | -          | -    | -    | -    | ○      | -    | -   | -     | -    | -    | -   | -     | -     | -   | -    | -    | -    | -     | -     | -      | - |
| RPS6KA1     | RSK1             |                   | NM_002953              | 1   | 26873463        | c.T214G  | p.S72A     | -          | -    | ○    | -    | -      | -    | -   | -     | -    | -    | -   | -     | -     | -   | -    | -    | -    | -     | -     | -      |   |
| RPS6KA1     | RSK1             | rs2229712         | NM_002953              | 1   | 26883511        | c.A1004C | p.K335T    | -          | -    | -    | -    | -      | -    | -   | -     | -    | ○    | -   | -     | ○     | -   | -    | -    | -    | ○     | -     | -      |   |
| RPS6KA6     | RSK4             | rs6616890         | NM_014496              | X   | 83320017        | c.G2074A | p.D692N    | ○          | -    | -    | -    | -      | -    | -   | -     | -    | -    | -   | ○     | ○     | -   | -    | ○    | -    | -     | -     | -      |   |
| RPS6KB2     | S6K2             |                   | NM_003952              | 11  | 67202161        | c.G1264A | p.V422I    | -          | ○    | -    | -    | -      | -    | -   | -     | -    | -    | -   | -     | -     | -   | -    | -    | -    | -     | -     | -      |   |
| RPS6KB2     | S6K2             | rs55987642        | NM_003952              | 11  | 67200812        | c.C800T  | p.P267L    | -          | -    | -    | -    | ○      | -    | -   | -     | ○    | -    | -   | -     | -     | -   | -    | -    | ○    | ○     | -     | -      |   |
| RPS6KB2     | S6K2             | rs13859           | NM_003952              | 11  | 67202156        | c.C1259T | p.A420V    | ○          | ○    | ○    | ○    | ○      | -    | -   | -     | ○    | ○    | -   | -     | -     | -   | ○    | ○    | ○    | ○     | -     | -      |   |
| STK11       | LKB1             | rs59912467        | NM_000455              | 19  | 1223125         | c.C1062G | p.F354L    | -          | -    | ○    | -    | -      | -    | -   | -     | -    | -    | -   | -     | ○     | -   | -    | -    | -    | -     | -     | -      |   |

<sup>a</sup>Reference Cluster ID registered in the dbSNP (<http://www.ncbi.nlm.nih.gov/projects/SNP/>) database (as of March 2013).

<sup>b</sup>RefSeq accession number registered in the NCBI database.

Shaded rows indicate DNA variations not registered as genetic polymorphisms in the dbSNP database.



### Supplementary Table S8. Chou-Talalay median dose effect analysis

|                                    | 1            | 2            | 3            | 4            | 5            |
|------------------------------------|--------------|--------------|--------------|--------------|--------------|
| <b>AZD8055 (nM)</b>                | <b>12.5</b>  | <b>25</b>    | <b>50</b>    | <b>100</b>   | <b>200</b>   |
| <b>CI-1040 (<math>\mu</math>M)</b> | <b>3.75</b>  | <b>7.5</b>   | <b>15</b>    | <b>30</b>    | <b>60</b>    |
| <b>Drug Combination Ratio</b>      | <b>1:300</b> | <b>1:300</b> | <b>1:300</b> | <b>1:300</b> | <b>1:300</b> |
| <b>CI<sup>a</sup></b>              | <b>0.893</b> | <b>0.766</b> | <b>0.711</b> | <b>0.709</b> | <b>0.835</b> |

<sup>a</sup>CI value was calculated using the CompuSyn software package (ComboSyn, Inc, <http://www.combosyn.com>). CI = 1, additive effect; CI <1, synergistic effect; CI >1, antagonistic effect.  
**Abbreviations:** CI, combination index.

**Supplementary Table S9. List of the MAPK and mTOR signaling components for unsupervised hierarchical clustering analyses**

| #  | Signaling Components | Phosphorylation site(s) | KEGG Pathway <sup>a</sup> | CST Antibody Category |
|----|----------------------|-------------------------|---------------------------|-----------------------|
| 1  | p-p53                | Ser20                   | MAPK                      | DNA damage            |
| 2  | p-p53                | Ser46                   | MAPK                      | DNA damage            |
| 3  | p-p53                | Ser15 16G8              | MAPK                      | DNA damage            |
| 4  | p-p53                | Ser37                   | MAPK                      | DNA damage            |
| 5  | p-p53                | Ser392                  | MAPK                      | DNA damage            |
| 6  | p-p53                | Ser6                    | MAPK                      | DNA damage            |
| 7  | p-p53                | Ser9                    | MAPK                      | DNA damage            |
| 8  | p-p53                | Ser15                   | MAPK                      | DNA damage            |
| 9  | p-NFκB p65           | Ser536                  | MAPK                      | NFκB                  |
| 10 | p-NFκB p65           | Ser276                  | MAPK                      | NFκB                  |
| 11 | p-NFκB p65           | Ser468                  | MAPK                      | NFκB                  |
| 12 | p-ATF-2              | Thr71 11G2              | MAPK                      | p38 MAPK              |
| 13 | p-HSP27              | Ser82                   | MAPK                      | p38 MAPK              |
| 14 | p-MAPKAPK-2          | Thr222                  | MAPK                      | p38 MAPK              |
| 15 | p-MAPKAPK-2          | Thr2334                 | MAPK                      | p38 MAPK              |
| 16 | p-MKK3/MKK6          | Ser189/207              | MAPK                      | p38 MAPK              |
| 17 | p-MSK1               | Thr581                  | MAPK                      | p38 MAPK              |
| 18 | p-p38 MAPK           | Thr180/Y182             | MAPK                      | p38 MAPK              |
| 19 | p44/42 MAP kinase    | Thr202/Tyr204           | MAPK                      | Ras-Raf               |
| 20 | p-CREB               | Ser133                  | MAPK                      | Ras-Raf               |
| 21 | p-MEK1/2             | Ser217/221              | MAPK                      | Ras-Raf               |
| 22 | p-Mnk1               | Thr197/202              | MAPK                      | Ras-Raf               |
| 23 | p-p90RSK             | Thr359/Ser363           | MAPK                      | Ras-Raf               |
| 24 | p-p90RSK             | Ser380                  | MAPK                      | Ras-Raf               |
| 25 | p-p90RSK             | Thr573                  | MAPK                      | Ras-Raf               |
| 26 | p-PAK1               | Ser144                  | MAPK                      | Ras-Raf               |
| 27 | p-PAK1               | Ser199/204              | MAPK                      | Ras-Raf               |
| 28 | p-PAK1               | Thr423                  | MAPK                      | Ras-Raf               |
| 29 | p-PAK2               | Ser20                   | MAPK                      | Ras-Raf               |
| 30 | p-Raf-A              | Ser299                  | MAPK                      | Ras-Raf               |
| 31 | p-Raf-b              | ser445                  | MAPK                      | Ras-Raf               |
| 32 | p-Raf-c              | Ser338                  | MAPK                      | Ras-Raf               |
| 33 | p-Raf-c              | Ser289/296/301          | MAPK                      | Ras-Raf               |
| 34 | p-Raf-c              | Ser259                  | MAPK                      | Ras-Raf               |
| 35 | p-RSK                | Thr356/Ser360           | MAPK                      | Ras-Raf               |
| 36 | p-RSK2               | Ser227                  | MAPK                      | PI3K-AKT-mTOR         |
| 37 | p-EGF Receptor       | Tyr1045                 | MAPK                      | RTK/TK                |
| 38 | p-EGF Receptor       | Tyr1068                 | MAPK                      | RTK/TK                |
| 39 | p-EGF Receptor       | Tyr992                  | MAPK                      | RTK/TK                |
| 40 | p-PDGF Receptor-β    | Thr1009                 | MAPK                      | RTK/TK                |
| 41 | p-PDGF Receptor-β    | Thr740                  | MAPK                      | RTK/TK                |
| 42 | p-PDGF Receptor-β    | Thr751                  | MAPK                      | RTK/TK                |
| 43 | p-PDGF Receptor-β    | Thr771                  | MAPK                      | RTK/TK                |
| 44 | p-PDGF Receptor-β    | Thr1021                 | MAPK                      | RTK/TK                |
| 45 | p-ATF-2              | Thr71                   | MAPK                      | SAPK/JNK              |
| 46 | p-c-Jun              | Ser63                   | MAPK                      | SAPK/JNK              |

|    |                        |               |      |                    |
|----|------------------------|---------------|------|--------------------|
| 47 | p-c-Jun                | Ser73         | MAPK | SAPK/JNK           |
| 48 | p-SAPK/JNK             | Thr183/Y185   | MAPK | SAPK/JNK           |
| 49 | p-SAPK/JNK             | Thr183/Tyr185 | MAPK | SAPK/JNK           |
| 50 | p-SEK1/MKK4            | Thr261        | MAPK | SAPK/JNK           |
| 51 | p-TAK1                 | Thr184/187    | MAPK | TGF- $\beta$       |
| 52 | p-AMPK $\alpha$        | Thr172        | mTOR | Glucose metabolism |
| 53 | p-IRS-1                | Ser307        | mTOR | Glucose metabolism |
| 54 | p-IRS-1                | Ser612        | mTOR | Glucose metabolism |
| 55 | p-IRS-1                | Ser636/639    | mTOR | Glucose metabolism |
| 56 | p-LKB1                 | Ser428        | mTOR | Glucose metabolism |
| 57 | p-PKC(pan) $\beta$ II  | Ser660        | mTOR | Phospholipase      |
| 58 | p-PKC $\alpha/\beta$   | Thr638/641    | mTOR | Phospholipase      |
| 59 | p-4E-BP1               | Thr70         | mTOR | PI3K-AKT-mTOR      |
| 60 | p-4E-BP1               | Thr37/46      | mTOR | PI3K-AKT-mTOR      |
| 61 | p-4E-BP1               | Ser65         | mTOR | PI3K-AKT-mTOR      |
| 62 | p70-S6 kinase          | Thr389        | mTOR | PI3K-AKT-mTOR      |
| 63 | p-Akt                  | Thr308        | mTOR | PI3K-AKT-mTOR      |
| 64 | p-eEF2k                | Ser366        | mTOR | PI3K-AKT-mTOR      |
| 65 | p-eIF4B                | Ser422        | mTOR | PI3K-AKT-mTOR      |
| 66 | p-eIF4E                | Ser209        | mTOR | PI3K-AKT-mTOR      |
| 67 | p-eIF4G                | Ser1108       | mTOR | PI3K-AKT-mTOR      |
| 68 | p-GSK-3 $\alpha$       | Ser21         | mTOR | PI3K-AKT-mTOR      |
| 69 | p-GSK-3 $\alpha/\beta$ | Ser21/9       | mTOR | PI3K-AKT-mTOR      |
| 70 | p-GSK-3 $\beta$        | Ser9          | mTOR | PI3K-AKT-mTOR      |
| 71 | Phospho-Akt            | Ser473        | mTOR | PI3K-AKT-mTOR      |
| 72 | p-mTOR                 | Ser2448       | mTOR | PI3K-AKT-mTOR      |
| 73 | p-PDK1                 | Ser241        | mTOR | PI3K-AKT-mTOR      |
| 74 | p-PKD/PKCm             | Ser744/748    | mTOR | PI3K-AKT-mTOR      |
| 75 | p-PKD/PKCm             | Ser916        | mTOR | PI3K-AKT-mTOR      |
| 76 | p-PRAS40               | Thr246        | mTOR | PI3K-AKT-mTOR      |
| 77 | p-PTEN                 | Ser380        | mTOR | PI3K-AKT-mTOR      |
| 78 | p-Raptor               | Ser792        | mTOR | PI3K-AKT-mTOR      |
| 79 | p-S6Rb                 | Ser235/236    | mTOR | PI3K-AKT-mTOR      |
| 80 | p-S6Rb                 | Ser240/244    | mTOR | PI3K-AKT-mTOR      |
| 81 | p-Tuberin/TSC2         | Ser939        | mTOR | PI3K-AKT-mTOR      |
| 82 | p-Tuberin/TSC2         | Thr1462       | mTOR | PI3K-AKT-mTOR      |
| 83 | p-Tuberin/TSC2         | Thr1571       | mTOR | PI3K-AKT-mTOR      |

**Abbreviations:** CST, Cell Signaling Technology, Inc. (Danvers, MA)

<sup>a</sup>The MAPK and mTOR signaling components were selected based on KEGG pathway maps (<http://www.genome.jp/kegg/kegg3a.html>) and used for unsupervised hierarchical clustering analyses.

**Supplementary Table S10. Fisher's exact test: Association of cancer types with activation status of the MAPK and mTOR signaling**

|                   | A <sup>a</sup> | B <sup>b</sup> | <i>P</i> value (fisher's exact test) |
|-------------------|----------------|----------------|--------------------------------------|
| HCC               | 11             | 12             | 0.011                                |
| Ovarian Cancer    | 3              | 12             | 0.753                                |
| Gastric Cancer    | 3              | 12             | 0.753                                |
| Colon Cancer      | 2              | 7              | 1.000                                |
| Pancreatic Cancer | 2              | 7              | 1.000                                |
| Osteosarcoma      | 0              | 8              | 0.109                                |
| Lung Cancer       | 3              | 5              | 0.416                                |
| Oral Cancer       | 0              | 7              | 0.185                                |

<sup>a,b</sup> A and B indicate the subgroups shown in Supplementary Fig.2.
